# Supplementary material for: An Integrated Proteomics and Metabolomics Strategy for the Mechanism of Calcium Oxalate Crystal-Induced Kidney Injury
Source: Front Med (Lausanne). 2022 Mar 3;9:805356. doi: 10.3389/fmed.2022.805356 (PMC8927618; doi:10.3389/fmed.2022.805356)
Supplement: Supplementary file 1 [file Table_1.XLSX]

## Sheet: proteins
Gene Name	UniProtKB.ID	Identified.Protein Name	unique peptides	P.Value(Crystal group-Control group)	Fold.Change(Crystal group/Control group)
Actg1	ACTG_MOUSE	Actin, cytoplasmic 2	2	＜0.0001	1.32
Myh9	MYH9_MOUSE	Myosin-9	22	＜0.0001	1.65
Flna	B7FAU9_MOUSE	Filamin, alpha	6	＜0.0001	1.59
Hist1h2bc;Hist1h2be;Hist1h2bg	H2B1C_MOUSE	Histone H2B type 1-C/E/G	6	＜0.0001	1.48
Flnb	FLNB_MOUSE	Filamin-B	7	＜0.0001	1.41
Plec	PLEC_MOUSE	Plectin	5	＜0.0001	1.55
Vcl	VINC_MOUSE	Vinculin	20	＜0.0001	1.43
Hist1h4a;Hist1h4b;Hist1h4c;Hist1h4d;Hist1h4f;Hist1h4h;Hist1h4i;Hist1h4j;Hist1h4k;Hist1h4m;Hist2h4a;Hist4h4	H4_MOUSE	Histone H4	20	＜0.0001	1.42
Msn	MOES_MOUSE	Moesin	7	＜0.0001	1.54
Pfn1	PROF1_MOUSE	Profilin-1	9	＜0.0001	1.4
Ahnak	E9Q616_MOUSE	AHNAK nucleoprotein (desmoyokin)	5	＜0.0001	1.73
Mup10	A2BIN1_MOUSE	Major urinary protein 10	22	＜0.0001	2.87
Iqgap1	IQGA1_MOUSE	Ras GTPase-activating-like protein IQGAP1	23	＜0.0001	1.32
Vim	VIME_MOUSE	Vimentin	9	＜0.0001	1.95
Fn1	A0A087WR50_MOUSE	Fibronectin	8	＜0.0001	1.67
Macf1	E9PVY8_MOUSE	Microtubule-actin cross-linking factor 1	4	0.0071	1.37
Actn1	A1BN54_MOUSE	Alpha actinin 1a	22	＜0.0001	1.69
Hnrnpk	B2M1R6_MOUSE	Heterogeneous nuclear ribonucleoprotein K	9	＜0.0001	1.36
Cfl1	COF1_MOUSE	Cofilin-1	8	＜0.0001	1.6
Myl6	MYL6_MOUSE	Myosin light polypeptide 6	6	＜0.0001	1.57
Lmna	LMNA_MOUSE	Prelamin-A/C	22	＜0.0001	1.55
Lgals1	LEG1_MOUSE	Galectin-1	8	＜0.0001	2.36
Rps27a	RS27A_MOUSE	Ubiquitin-40S ribosomal protein S27a	23	＜0.0001	1.33
Anxa2	ANXA2_MOUSE	Annexin A2	8	＜0.0001	1.74
Hnrnpu	HNRPU_MOUSE	Heterogeneous nuclear ribonucleoprotein U	22	＜0.0001	1.32
Myl12a	Q6ZWQ9_MOUSE	MCG5400	2	＜0.0001	2.04
Tpm1	F8WID5_MOUSE	Tropomyosin alpha-1 chain	6	＜0.0001	1.53
Hnrnpf	HNRPF_MOUSE	Heterogeneous nuclear ribonucleoprotein F	7	＜0.0001	1.38
Gm9242	J3QNY1_MOUSE	Uncharacterized protein	2	＜0.0001	1.43
Lmnb1	LMNB1_MOUSE	Lamin-B1	6	＜0.0001	1.44
Ncl	NUCL_MOUSE	Nucleolin	7	＜0.0001	1.54
Anxa5	ANXA5_MOUSE	Annexin A5	22	＜0.0001	1.58
Fgb	FIBB_MOUSE	Fibrinogen beta chain	6	＜0.0001	1.36
Scin	ADSV_MOUSE	Adseverin	5	＜0.0001	1.54
Col14a1	B7ZNH7_MOUSE	Collagen alpha-1(XIV) chain	6	＜0.0001	1.38
Mvp	MVP_MOUSE	Major vault protein	6	＜0.0001	1.69
Tagln2	TAGL2_MOUSE	Transgelin-2	9	＜0.0001	1.85
Clic1	CLIC1_MOUSE	Chloride intracellular channel protein 1	8	＜0.0001	1.37
Anxa4	ANXA4_MOUSE	Annexin A4	8	＜0.0001	1.48
Ctsd	CATD_MOUSE	Cathepsin D	6	＜0.0001	1.83
Tpm4	TPM4_MOUSE	Tropomyosin alpha-4 chain	22	＜0.0001	1.92
Rrbp1	A2AVJ7_MOUSE	Ribosome-binding protein 1	5	＜0.0001	1.32
Col12a1	COCA1_MOUSE	Collagen alpha-1(XII) chain	4	＜0.0001	1.87
Krt18	K1C18_MOUSE	Keratin, type I cytoskeletal 18	5	＜0.0001	1.74
Hist1h1c	H12_MOUSE	Histone H1.2	3	＜0.0001	1.64
Umod	UROM_MOUSE	Uromodulin	9	＜0.0001	2.14
Krt8	K2C8_MOUSE	Keratin, type II cytoskeletal 8	6	＜0.0001	2.06
Serpinh1	SERPH_MOUSE	Serpin H1	6	＜0.0001	1.42
Tubb2b	TBB2B_MOUSE	Tubulin beta-2B chain	6	0.0039	1.52
Cap1	CAP1_MOUSE	Adenylyl cyclase-associated protein 1	6	＜0.0001	1.39
Tpm3	E9Q5J9_MOUSE	Tropomyosin alpha-3 chain	20	0.0039	1.71
Syncrip	A0A0R4J259_MOUSE	Heterogeneous nuclear ribonucleoprotein Q	8	＜0.0001	1.38
Npm1	NPM_MOUSE	Nucleophosmin	9	＜0.0001	1.48
Tpr	Q7M739_MOUSE	Nuclear pore complex-associated intranuclear coiled-coil protein TPR	4	＜0.0001	1.36
Lcp1	PLSL_MOUSE	Plastin-2	5	＜0.0001	2.1
42985	E9Q1G8_MOUSE	Septin-7	2	＜0.0001	1.32
Mylk	B1B1A8_MOUSE	Myosin light chain kinase, smooth muscle	5	＜0.0001	1.32
Vwa5a	VMA5A_MOUSE	von Willebrand factor A domain-containing protein 5A	5	＜0.0001	1.49
Cryab	CRYAB_MOUSE	Alpha-crystallin B chain	4	＜0.0001	1.45
Krt7	K2C7_MOUSE	Keratin, type II cytoskeletal 7	7	＜0.0001	1.67
Hnrnpa1	Q5EBP8_MOUSE	Heterogeneous nuclear ribonucleoprotein A1	8	＜0.0001	1.45
Serpinb6	SPB6_MOUSE	Serpin B6	6	＜0.0001	1.53
Capn2	CAN2_MOUSE	Calpain-2 catalytic subunit	4	＜0.0001	1.33
Fgg	FIBG_MOUSE	Fibrinogen gamma chain	5	＜0.0001	1.42
Gls	GLSK_MOUSE	Glutaminase kidney isoform, mitochondrial	5	＜0.0001	1.34
Anxa1	ANXA1_MOUSE	Annexin A1	22	＜0.0001	1.74
Hpx	HEMO_MOUSE	Hemopexin	8	＜0.0001	1.49
Tubb5	TBB5_MOUSE	Tubulin beta-5 chain	20	＜0.0001	1.44
Fga	FIBA_MOUSE	Fibrinogen alpha chain	6	＜0.0001	1.39
42980	SEPT2_MOUSE	Septin-2	20	＜0.0001	1.45
Fbn1	FBN1_MOUSE	Fibrillin-1	5	＜0.0001	1.64
Arhgdia	GDIR1_MOUSE	Rho GDP-dissociation inhibitor 1	8	＜0.0001	1.33
Ppfibp1	LIPB1_MOUSE	Liprin-beta-1	4	＜0.0001	1.41
Anp32a	D3YYE1_MOUSE	Acidic leucine-rich nuclear phosphoprotein 32 family member A (Fragment)	9	＜0.0001	1.31
Tagln	TAGL_MOUSE	Transgelin	5	＜0.0001	1.99
Hist2h3c1	A0A1W2P768_MOUSE	Histone H3.2	2	＜0.0001	1.31
Ilk	ILK_MOUSE	Integrin-linked protein kinase	6	＜0.0001	1.38
Rplp2	RLA2_MOUSE	60S acidic ribosomal protein P2	6	＜0.0001	1.33
Myof	E9Q390_MOUSE	Myoferlin	3	＜0.0001	1.73
Rsu1	Q9D031_MOUSE	Putative uncharacterized protein	6	＜0.0001	1.44
Anxa3	ANXA3_MOUSE	Annexin A3	6	＜0.0001	2.41
Calu	CALU_MOUSE	Calumenin	6	＜0.0001	1.53
Ckb	KCRB_MOUSE	Creatine kinase B-type	6	＜0.0001	1.73
Tmod3	TMOD3_MOUSE	Tropomodulin-3	6	＜0.0001	1.32
Chd4	CHD4_MOUSE	Chromodomain-helicase-DNA-binding protein 4	4	＜0.0001	1.34
Col18a1	COIA1_MOUSE	Collagen alpha-1(XVIII) chain	5	＜0.0001	1.53
Samhd1	F6TVP2_MOUSE	Deoxynucleoside triphosphate triphosphohydrolase SAMHD1 (Fragment)	4	＜0.0001	1.39
Cp	G3X8Q5_MOUSE	Ceruloplasmin	5	＜0.0001	1.32
Psme1	G3UXZ5_MOUSE	Proteasome activator complex subunit 1 (Fragment)	6	＜0.0001	1.42
Akap12	AKA12_MOUSE	A-kinase anchor protein 12	4	＜0.0001	1.83
Serpinb9	O08797_MOUSE	Putative uncharacterized protein	6	＜0.0001	1.58
Lrp1	A0A0R4J0I9_MOUSE	Low density lipoprotein receptor-related protein 1	3	＜0.0001	1.37
Cbx3	Q9DCC5_MOUSE	Cbx3 protein	6	＜0.0001	1.54
Ybx1	YBOX1_MOUSE	Nuclease-sensitive element-binding protein 1	7	＜0.0001	1.4
Srsf1	H7BX95_MOUSE	Serine/arginine-rich-splicing factor 1	20	＜0.0001	1.36
Fbl	FBRL_MOUSE	rRNA 2'-O-methyltransferase fibrillarin	6	＜0.0001	1.36
H6pd	G6PE_MOUSE	GDH/6PGL endoplasmic bifunctional protein	6	＜0.0001	1.34
Bgn	PGS1_MOUSE	Biglycan	5	＜0.0001	1.66
Krt19	K1C19_MOUSE	Keratin, type I cytoskeletal 19	3	＜0.0001	1.65
Crk	CRK_MOUSE	Adapter molecule crk	6	＜0.0001	1.33
Trim28	TIF1B_MOUSE	Transcription intermediary factor 1-beta	4	＜0.0001	1.49
Lyz2	LYZ2_MOUSE	Lysozyme C-2	2	0.00043	1.36
Ywhah	1433F_MOUSE	14-3-3 protein eta	5	＜0.0001	1.51
Hnrnpc	HNRPC_MOUSE	Heterogeneous nuclear ribonucleoproteins C1/C2	6	＜0.0001	1.4
Csrp1	CSRP1_MOUSE	Cysteine and glycine-rich protein 1	5	＜0.0001	1.55
Rtn4	RTN4_MOUSE	Reticulon-4	5	＜0.0001	1.51
Ktn1	A0A087WQ25_MOUSE	Kinectin	4	＜0.0001	1.41
Ckap4	CKAP4_MOUSE	Cytoskeleton-associated protein 4	5	＜0.0001	1.71
Hmgb1	HMGB1_MOUSE	High mobility group protein B1	5	＜0.0001	1.37
Emilin1	EMIL1_MOUSE	EMILIN-1	7	＜0.0001	1.51
Lpp	LPP_MOUSE	Lipoma-preferred partner homolog	22	＜0.0001	1.42
Vat1	VAT1_MOUSE	Synaptic vesicle membrane protein VAT-1 homolog	6	＜0.0001	1.59
Esyt1	ESYT1_MOUSE	Extended synaptotagmin-1	5	＜0.0001	1.47
Des	DESM_MOUSE	Desmin	5	＜0.0001	1.64
Dpysl3	E9PWE8_MOUSE	Dihydropyrimidinase-related protein 3	5	＜0.0001	2.01
Cald1	E9QA15_MOUSE	Caldesmon 1	6	＜0.0001	1.6
Prpf19	PRP19_MOUSE	Pre-mRNA-processing factor 19	9	＜0.0001	1.33
Sf3a1	SF3A1_MOUSE	Splicing factor 3A subunit 1	2	＜0.0001	1.4
Tnc	TENA_MOUSE	Tenascin	3	＜0.0001	1.88
Map4	MAP4_MOUSE	Microtubule-associated protein 4	4	＜0.0001	1.44
Capg	Q99LB4_MOUSE	Capping protein (Actin filament), gelsolin-like	4	＜0.0001	1.82
Alyref	THOC4_MOUSE	THO complex subunit 4	3	＜0.0001	1.44
Csrp2	CSRP2_MOUSE	Cysteine and glycine-rich protein 2	20	＜0.0001	1.77
Itih4	E9PVD2_MOUSE	Inter alpha-trypsin inhibitor, heavy chain 4	5	＜0.0001	1.54
Kng1	A0A0R4J038_MOUSE	Kininogen-1	5	＜0.0001	1.42
Prmt1	A0A171KXD3_MOUSE	Protein arginine N-methyltransferase 1	5	＜0.0001	1.42
Parp1	Q921K2_MOUSE	Poly [ADP-ribose] polymerase	3	＜0.0001	1.32
Ptpn23	PTN23_MOUSE	Tyrosine-protein phosphatase non-receptor type 23	4	＜0.0001	1.36
Smarcc2	Q3UID0_MOUSE	Putative uncharacterized protein	3	＜0.0001	1.35
42987	A2A6U3_MOUSE	Septin-9	2	＜0.0001	1.36
Ssb	LA_MOUSE	Lupus La protein homolog	4	＜0.0001	1.31
Serpinb6b	O08804_MOUSE	NK13	4	＜0.0001	1.59
Erap1	ERAP1_MOUSE	Endoplasmic reticulum aminopeptidase 1	4	＜0.0001	1.35
Ptpn6	PTN6_MOUSE	Tyrosine-protein phosphatase non-receptor type 6	3	＜0.0001	1.34
Sod3	SODE_MOUSE	Extracellular superoxide dismutase [Cu-Zn]	22	＜0.0001	1.36
Ddah2	DDAH2_MOUSE	N(G),N(G)-dimethylarginine dimethylaminohydrolase 2	6	＜0.0001	1.36
Ppl	G5E898_MOUSE	Periplakin	3	＜0.0001	1.35
H2-K1	HA1D_MOUSE	H-2 class I histocompatibility antigen, K-D alpha chain	2	＜0.0001	1.51
Cstb	CYTB_MOUSE	Cystatin-B	3	＜0.0001	1.67
Serpinb1a	ILEUA_MOUSE	Leukocyte elastase inhibitor A	6	＜0.0001	1.31
Ppp1r12a	MYPT1_MOUSE	Protein phosphatase 1 regulatory subunit 12A	3	＜0.0001	1.41
Col15a1	A2AJY2_MOUSE	Collagen alpha-1(XV) chain	4	＜0.0001	1.54
Esyt2	ESYT2_MOUSE	Extended synaptotagmin-2	6	＜0.0001	1.33
Hnrnpdl	F6VQH5_MOUSE	Heterogeneous nuclear ribonucleoprotein D-like (Fragment)	3	＜0.0001	1.45
42989	A0A0J9YTY0_MOUSE	Septin-11	2	＜0.0001	1.37
Fus	FUS_MOUSE	RNA-binding protein FUS	5	＜0.0001	1.52
Hspb1	HSPB1_MOUSE	Heat shock protein beta-1	4	＜0.0001	1.82
Lum	LUM_MOUSE	Lumican	7	＜0.0001	1.59
Thop1	A0A0R4IZY0_MOUSE	Thimet oligopeptidase	4	＜0.0001	1.31
Mcm2	MCM2_MOUSE	DNA replication licensing factor MCM2	3	＜0.0001	1.34
Pgm2	PGM2_MOUSE	Phosphoglucomutase-2	4	＜0.0001	1.34
Ptma	PTMA_MOUSE	Prothymosin alpha	4	＜0.0001	2.16
Snrpd2	SMD2_MOUSE	Small nuclear ribonucleoprotein Sm D2	6	＜0.0001	1.38
Set	A2BE93_MOUSE	Protein SET (Fragment)	7	＜0.0001	1.78
Col1a1	CO1A1_MOUSE	Collagen alpha-1(I) chain	4	＜0.0001	1.36
Snrpd3	SMD3_MOUSE	Small nuclear ribonucleoprotein Sm D3	4	＜0.0001	1.34
Pcna	PCNA_MOUSE	Proliferating cell nuclear antigen	4	＜0.0001	1.34
Arpc1b	ARC1B_MOUSE	Actin-related protein 2/3 complex subunit 1B	3	＜0.0001	1.64
G6pdx	G6PD1_MOUSE	Glucose-6-phosphate 1-dehydrogenase X	2	＜0.0001	1.36
Mcm3	MCM3_MOUSE	DNA replication licensing factor MCM3	2	＜0.0001	1.43
Ptms	PTMS_MOUSE	Parathymosin	20	＜0.0001	1.4
Cgn	D3YUW7_MOUSE	Cingulin	4	＜0.0001	1.49
Myo1e	MYO1E_MOUSE	Unconventional myosin-Ie	3	＜0.0001	1.35
Sae1	SAE1_MOUSE	SUMO-activating enzyme subunit 1	3	＜0.0001	1.33
Aldh1a1	AL1A1_MOUSE	Retinal dehydrogenase 1	4	＜0.0001	1.4
Gmds	GMDS_MOUSE	GDP-mannose 4,6 dehydratase	3	＜0.0001	1.39
Hprt1	HPRT_MOUSE	Hypoxanthine-guanine phosphoribosyltransferase	3	＜0.0001	1.34
Pdlim5	PDLI5_MOUSE	PDZ and LIM domain protein 5	4	＜0.0001	1.38
Ptpn13	G5E8B1_MOUSE	Protein tyrosine phosphatase, non-receptor type 13	3	＜0.0001	1.43
Isyna1	INO1_MOUSE	Inositol-3-phosphate synthase 1	3	＜0.0001	1.31
Mrc2	MRC2_MOUSE	C-type mannose receptor 2	4	＜0.0001	1.42
Sf3b2	Q3UJB0_MOUSE	Putative uncharacterized protein	2	＜0.0001	1.34
Ctsl	CATL1_MOUSE	Cathepsin L1	4	＜0.0001	1.46
Hist1h1e	H14_MOUSE	Histone H1.4	4	＜0.0001	1.67
Mcm5	MCM5_MOUSE	DNA replication licensing factor MCM5	3	＜0.0001	1.33
Mcm6	MCM6_MOUSE	DNA replication licensing factor MCM6	3	＜0.0001	1.4
Ftl1	Q9CPX4_MOUSE	Ferritin	5	＜0.0001	1.82
Capns1	A0A0R4IZW8_MOUSE	Calpain small subunit 1	2	＜0.0001	1.4
Dbn1	A0A0R4J1E3_MOUSE	Drebrin	4	＜0.0001	1.34
Lamp1	LAMP1_MOUSE	Lysosome-associated membrane glycoprotein 1	6	＜0.0001	1.46
Igfbp7	F8WH23_MOUSE	Insulin-like growth factor-binding protein 7	7	＜0.0001	1.69
Fubp1	A0A0G2JGW9_MOUSE	Far upstream element-binding protein 1	3	＜0.0001	1.36
Hist1h1b	H15_MOUSE	Histone H1.5	5	＜0.0001	1.66
Mapk3	MK03_MOUSE	Mitogen-activated protein kinase 3	4	＜0.0001	1.37
Rplp1	RLA1_MOUSE	60S acidic ribosomal protein P1	4	＜0.00016	1.32
Tpm2	A2AIM4_MOUSE	Tropomyosin beta chain	6	＜0.0001	1.61
Cd2ap	CD2AP_MOUSE	CD2-associated protein	3	＜0.0001	1.54
Nucb2	NUCB2_MOUSE	Nucleobindin-2	5	＜0.0001	1.31
Mup3	Q3KQQ2_MOUSE	MCG15829, isoform CRA_a	5	＜0.0001	1.79
Ssrp1	SSRP1_MOUSE	FACT complex subunit SSRP1	5	＜0.0001	1.46
Aldh1a2	AL1A2_MOUSE	Retinal dehydrogenase 2	3	＜0.0001	2.71
Chil3	CHIL3_MOUSE	Chitinase-like protein 3	4	＜0.0001	2.25
S100a11	S10AB_MOUSE	Protein S100-A11	9	＜0.0001	2.38
Smarca4	A0A0R4J170_MOUSE	Transcription activator BRG1	3	＜0.0001	1.31
Asah1	ASAH1_MOUSE	Acid ceramidase	4	＜0.0001	1.43
Hdgf	HDGF_MOUSE	Hepatoma-derived growth factor	4	＜0.0001	1.39
Sh3gl1	SH3G1_MOUSE	Endophilin-A2	4	＜0.0001	1.35
Srsf3	SRSF3_MOUSE	Serine/arginine-rich splicing factor 3	5	＜0.0001	1.31
Parva	PARVA_MOUSE	Alpha-parvin	5	＜0.0001	1.35
Rbp1	RET1_MOUSE	Retinol-binding protein 1	4	＜0.0001	1.39
Srsf5	Q9D8S5_MOUSE	MCG7614, isoform CRA_c	6	＜0.0001	1.48
Epb41l2	E41L2_MOUSE	Band 4.1-like protein 2	3	＜0.0001	1.37
Lgals3bp	LG3BP_MOUSE	Galectin-3-binding protein	4	＜0.0001	1.56
Ubtf	A2AWT5_MOUSE	Nucleolar transcription factor 1	4	＜0.0001	1.33
Gbp2	GBP2_MOUSE	Guanylate-binding protein 2	6	＜0.0001	1.32
Nup62	NUP62_MOUSE	Nuclear pore glycoprotein p62	6	＜0.0001	1.42
Rbmx	RBMX_MOUSE	RNA-binding motif protein, X chromosome	3	＜0.0001	1.44
Orm1	A1AG1_MOUSE	Alpha-1-acid glycoprotein 1	5	＜0.0001	1.68
Ctsc	CATC_MOUSE	Dipeptidyl peptidase 1	4	＜0.0001	1.77
Hp	HPT_MOUSE	Haptoglobin	3	＜0.0001	2.79
Nasp	NASP_MOUSE	Nuclear autoantigenic sperm protein	2	＜0.0001	1.39
Plin3	PLIN3_MOUSE	Perilipin-3	4	＜0.0001	1.51
Hnrnpa0	ROA0_MOUSE	Heterogeneous nuclear ribonucleoprotein A0	6	＜0.0001	1.38
Fermt1	FERM1_MOUSE	Fermitin family homolog 1	3	＜0.0001	1.38
Myl9	MYL9_MOUSE	Myosin regulatory light polypeptide 9	6	＜0.0001	1.36
Sh3bgrl	SH3L1_MOUSE	SH3 domain-binding glutamic acid-rich-like protein	5	＜0.0001	1.74
Serpina3n	SPA3N_MOUSE	Serine protease inhibitor A3N	4	＜0.0001	2.13
Stat3	STAT3_MOUSE	Signal transducer and activator of transcription 3	5	＜0.0001	1.41
Apex1	APEX1_MOUSE	DNA-(apurinic or apyrimidinic site) lyase	4	＜0.0001	1.42
Fth1	FRIH_MOUSE	Ferritin heavy chain	3	＜0.0001	2.04
Lgals3	LEG3_MOUSE	Galectin-3	6	＜0.0001	1.87
Psme2	G3X9V0_MOUSE	MCG22048, isoform CRA_a	3	＜0.0001	1.42
Hpcal1	HPCL1_MOUSE	Hippocalcin-like protein 1	3	＜0.0001	1.31
Lsm8	LSM8_MOUSE	U6 snRNA-associated Sm-like protein LSm8	5	0.0011	1.32
Pea15	PEA15_MOUSE	Astrocytic phosphoprotein PEA-15	4	＜0.0001	1.73
Acsl4	ACSL4_MOUSE	Long-chain-fatty-acid--CoA ligase 4	3	＜0.0001	1.31
Hist1h1d	H13_MOUSE	Histone H1.3	6	0.0039	1.85
Lasp1	LASP1_MOUSE	LIM and SH3 domain protein 1	5	＜0.0001	1.43
Napsa	NAPSA_MOUSE	Napsin-A	3	＜0.0001	1.43
Nt5c	NT5C_MOUSE	5'(3')-deoxyribonucleotidase, cytosolic type	4	＜0.0001	1.33
Thbs1	Q80YQ1_MOUSE	Thrombospondin 1	2	＜0.0001	1.65
Skt	SKT_MOUSE	Sickle tail protein	2	＜0.0001	1.45
Serbp1	A0A0N4SV32_MOUSE	Plasminogen activator inhibitor 1 RNA-binding protein	3	＜0.0001	1.44
Arhgdib	GDIR2_MOUSE	Rho GDP-dissociation inhibitor 2	3	＜0.0001	1.56
Pxdn	PXDN_MOUSE	Peroxidasin homolog	3	＜0.0001	1.48
Banf1	BAF_MOUSE	Barrier-to-autointegration factor	4	＜0.0001	1.35
Dek	DEK_MOUSE	Protein DEK	2	＜0.0001	1.31
Fam129a	NIBAN_MOUSE	Protein Niban	2	＜0.0001	1.36
Efhd2	Q8C845_MOUSE	EF-hand domain-containing protein D2	4	＜0.0001	1.8
Rbm14	RBM14_MOUSE	RNA-binding protein 14	3	＜0.0001	1.46
Snrpd1	SMD1_MOUSE	Small nuclear ribonucleoprotein Sm D1	4	＜0.0001	1.41
Arpc5	ARPC5_MOUSE	Actin-related protein 2/3 complex subunit 5	3	＜0.0001	1.39
Acot7	BACH_MOUSE	Cytosolic acyl coenzyme A thioester hydrolase	2	＜0.0001	1.42
Coro1a	COR1A_MOUSE	Coronin-1A	4	＜0.0001	2.28
Dcps	DCPS_MOUSE	m7GpppX diphosphatase	4	＜0.0001	1.32
Supt16	G3X956_MOUSE	Suppressor of Ty 16	2	＜0.0001	1.31
Gbp4	GBP4_MOUSE	Guanylate-binding protein 4	2	＜0.0001	1.65
H2-Ab1	HB2Q_MOUSE	H-2 class II histocompatibility antigen, A-Q beta chain	3	＜0.0001	1.79
S100a10	S10AA_MOUSE	Protein S100-A10	6	＜0.0001	1.83
Vnn1	VNN1_MOUSE	Pantetheinase	5	＜0.0001	1.43
Ewsr1	EWS_MOUSE	RNA-binding protein EWS	4	＜0.0001	1.47
Triobp	TARA_MOUSE	TRIO and F-actin-binding protein	3	＜0.0001	1.38
Phldb1	D3Z0X5_MOUSE	Pleckstrin homology-like domain family B member 1	2	＜0.0001	1.41
Pdgfrb	E9QN12_MOUSE	Platelet-derived growth factor receptor beta	4	＜0.0001	1.39
Kank2	KANK2_MOUSE	KN motif and ankyrin repeat domain-containing protein 2	3	＜0.0001	1.42
Mcm4	MCM4_MOUSE	DNA replication licensing factor MCM4	2	＜0.0001	1.31
Palld	PALLD_MOUSE	Palladin	3	＜0.0001	1.39
Ptk7	PTK7_MOUSE	Inactive tyrosine-protein kinase 7	3	＜0.0001	1.31
Dis3	RRP44_MOUSE	Exosome complex exonuclease RRP44	5	＜0.0001	1.4
Ampd3	A0A1L1SRX2_MOUSE	AMP deaminase	2	＜0.0001	1.31
Tpd52	E9PUA7_MOUSE	Tumor protein D52	4	＜0.0001	1.43
Erh	ERH_MOUSE	Enhancer of rudimentary homolog	5	＜0.0001	1.33
Gsto1	GSTO1_MOUSE	Glutathione S-transferase omega-1	2	＜0.0001	1.57
Diaph2	Q6W4W7_MOUSE	DIA3	2	＜0.0001	1.38
Exosc10	Q8K366_MOUSE	Exosc10 protein	3	＜0.0001	1.38
Thrap3	TR150_MOUSE	Thyroid hormone receptor-associated protein 3	3	＜0.0001	1.37
Twf2	TWF2_MOUSE	Twinfilin-2	4	＜0.0001	1.4
Pnn	Q3TUQ5_MOUSE	Pinin	3	＜0.0001	1.48
Tns3	TENS3_MOUSE	Tensin-3	2	＜0.0001	1.31
Rcn3	A0A1B0GR19_MOUSE	Reticulocalbin-3 (Fragment)	3	＜0.0001	1.52
Icam1	ICAM1_MOUSE	Intercellular adhesion molecule 1	6	＜0.0001	1.64
Rnmt	MCES_MOUSE	mRNA cap guanine-N7 methyltransferase	3	＜0.0001	1.45
Srsf2	SRSF2_MOUSE	Serine/arginine-rich splicing factor 2	3	＜0.0001	1.39
Akt1	AKT1_MOUSE	RAC-alpha serine/threonine-protein kinase	2	＜0.0001	1.31
Clu	CLUS_MOUSE	Clusterin	3	＜0.0001	1.55
Cnn2	CNN2_MOUSE	Calponin-2	4	＜0.0001	1.46
Fhl2	FHL2_MOUSE	Four and a half LIM domains protein 2	3	＜0.0001	1.34
Mcam	MUC18_MOUSE	Cell surface glycoprotein MUC18	2	＜0.0001	1.4
Ppt1	PPT1_MOUSE	Palmitoyl-protein thioesterase 1	3	＜0.0001	1.36
Snrpb	RSMB_MOUSE	Small nuclear ribonucleoprotein-associated protein B	5	＜0.0001	1.35
Tubb6	TBB6_MOUSE	Tubulin beta-6 chain	3	＜0.0001	1.57
Tax1bp3	TX1B3_MOUSE	Tax1-binding protein 3	2	＜0.0001	1.48
Vasp	VASP_MOUSE	Vasodilator-stimulated phosphoprotein	2	＜0.0001	1.37
Eppk1	EPIPL_MOUSE	Epiplakin	2	0.0013	1.53
Myadm	MYADM_MOUSE	Myeloid-associated differentiation marker	7	0.0067	1.32
Mthfd1l	C1TM_MOUSE	Monofunctional C1-tetrahydrofolate synthase, mitochondrial	5	＜0.0001	1.48
Eif6	IF6_MOUSE	Eukaryotic translation initiation factor 6	5	＜0.0001	1.52
Luc7l2	LC7L2_MOUSE	Putative RNA-binding protein Luc7-like 2	2	＜0.0001	1.4
Ncam1	NCAM1_MOUSE	Neural cell adhesion molecule 1	2	＜0.0001	1.72
Nup214	NU214_MOUSE	Nuclear pore complex protein Nup214	4	＜0.0001	1.33
Rcc2	RCC2_MOUSE	Protein RCC2	2	＜0.0001	1.37
Snrnp70	RU17_MOUSE	U1 small nuclear ribonucleoprotein 70 kDa	3	＜0.0001	1.39
Sub1	TCP4_MOUSE	Activated RNA polymerase II transcriptional coactivator p15	3	＜0.0001	1.34
Ubap2l	UBP2L_MOUSE	Ubiquitin-associated protein 2-like	4	＜0.0001	1.4
Arg2	ARGI2_MOUSE	Arginase-2, mitochondrial	3	＜0.0001	1.41
Pfdn4	E9Q6U4_MOUSE	Prefoldin subunit 4	3	＜0.0001	1.38
Fam49b	FA49B_MOUSE	Protein FAM49B	2	＜0.0001	1.46
Lrrfip1	LRRF1_MOUSE	Leucine-rich repeat flightless-interacting protein 1	3	＜0.0001	1.37
Cast	Q8CE80_MOUSE	Calpastatin	2	＜0.0001	1.34
Ranbp1	RANG_MOUSE	Ran-specific GTPase-activating protein	2	＜0.0001	1.35
Xrcc5	XRCC5_MOUSE	X-ray repair cross-complementing protein 5	4	＜0.0001	1.45
Arap1	ARAP1_MOUSE	Arf-GAP with Rho-GAP domain, ANK repeat and PH domain-containing protein 1	3	＜0.0001	1.39
Klk1	KLK1_MOUSE	Kallikrein-1	4	＜0.0001	1.67
Lzic	LZIC_MOUSE	Protein LZIC	3	＜0.0001	1.39
Rpa3	RFA3_MOUSE	Replication protein A 14 kDa subunit	2	＜0.0001	1.37
Tsn	TSN_MOUSE	Translin	3	＜0.0001	1.41
Havcr1	A0A0A0MQ86_MOUSE	Hepatitis A virus cellular receptor 1 homolog	2	＜0.0001	2.27
Sh3glb1	A0A0G2JEC4_MOUSE	Endophilin-B1	2	＜0.0001	1.31
Hrg	A0A0R4J039_MOUSE	Histidine-rich glycoprotein	3	＜0.0001	1.54
Fnbp1	A2AQ41_MOUSE	Formin-binding protein 1	2	＜0.0001	1.33
Cdc5l	CDC5L_MOUSE	Cell division cycle 5-like protein	3	＜0.0001	1.37
Mycbp2	F6SMY7_MOUSE	E3 ubiquitin-protein ligase MYCBP2 (Fragment)	2	0.00021	1.33
Slc25a24	SCMC1_MOUSE	Calcium-binding mitochondrial carrier protein SCaMC-1	4	＜0.0001	1.59
Anp32b	AN32B_MOUSE	Acidic leucine-rich nuclear phosphoprotein 32 family member B	5	＜0.00019	1.35
Dock10	E9QM99_MOUSE	Dedicator of cytokinesis protein 10	2	0.00035	2.48
Prkaa1	AAPK1_MOUSE	5'-AMP-activated protein kinase catalytic subunit alpha-1	3	0.00026	1.34
Apoe	APOE_MOUSE	Apolipoprotein E	2	＜0.0001	1.41
Dusp3	B1AQF4_MOUSE	Dual-specificity protein phosphatase 3	4	＜0.0001	1.31
Stmn1	D3Z5N2_MOUSE	Stathmin	2	＜0.0001	1.46
F13a1	F13A_MOUSE	Coagulation factor XIII A chain	2	＜0.0001	1.84
Nutf2	NTF2_MOUSE	Nuclear transport factor 2	2	＜0.0001	1.31
Nup88	NUP88_MOUSE	Nuclear pore complex protein Nup88	2	＜0.0001	1.32
Rexo2	ORN_MOUSE	Oligoribonuclease, mitochondrial	8	＜0.0001	1.32
Pdlim7	PDLI7_MOUSE	PDZ and LIM domain protein 7	2	＜0.0001	1.82
Lrg1	Q91XL1_MOUSE	Leucine-rich HEV glycoprotein	4	＜0.0001	2.3
Rnase4	RNAS4_MOUSE	Ribonuclease 4	2	＜0.0001	1.69
Rbm17	SPF45_MOUSE	Splicing factor 45	4	＜0.0001	1.42
Pycard	ASC_MOUSE	Apoptosis-associated speck-like protein containing a CARD	3	＜0.0001	1.47
Hmgb2	HMGB2_MOUSE	High mobility group protein B2	2	＜0.0001	1.42
Nmi	NMI_MOUSE	N-myc-interactor	4	＜0.0001	1.36
Postn	POSTN_MOUSE	Periostin	2	＜0.0001	1.38
Lsm2	LSM2_MOUSE	U6 snRNA-associated Sm-like protein LSm2	2	＜0.0001	1.34
Krt20	K1C20_MOUSE	Keratin, type I cytoskeletal 20	2	＜0.0001	2.5
Mbnl1	A0A0A6YXE3_MOUSE	Muscleblind-like protein 1	2	＜0.0001	1.35
Colgalt1	GT251_MOUSE	Procollagen galactosyltransferase 1	3	＜0.0001	1.31
Hist1h1a	H11_MOUSE	Histone H1.1	2	＜0.0001	1.43
Pdlim1	PDLI1_MOUSE	PDZ and LIM domain protein 1	3	＜0.0001	1.53
Tmem43	TMM43_MOUSE	Transmembrane protein 43	2	＜0.0001	1.33
Itpr3	ITPR3_MOUSE	Inositol 1,4,5-trisphosphate receptor type 3	2	＜0.0001	1.53
Cstf2	CSTF2_MOUSE	Cleavage stimulation factor subunit 2	2	＜0.0001	1.36
H2-K1	HA1K_MOUSE	H-2 class I histocompatibility antigen, K-K alpha chain	2	0.0041	1.36
Khdrbs1	KHDR1_MOUSE	KH domain-containing, RNA-binding, signal transduction-associated protein 1	4	＜0.0001	1.39
Aldh18a1	P5CS_MOUSE	Delta-1-pyrroline-5-carboxylate synthase	2	＜0.0001	1.65
Snrpe	RUXE_MOUSE	Small nuclear ribonucleoprotein E	2	＜0.0001	1.35
U2surp	SR140_MOUSE	U2 snRNP-associated SURP motif-containing protein	2	＜0.0001	1.39
Sun2	SUN2_MOUSE	SUN domain-containing protein 2	2	＜0.0001	1.34
Specc1	A0A0J9YUR2_MOUSE	Cytospin-B	2	＜0.0001	1.41
Tgfbi	BGH3_MOUSE	Transforming growth factor-beta-induced protein ig-h3	2	＜0.0001	1.34
Bin1	BIN1_MOUSE	Myc box-dependent-interacting protein 1	2	＜0.0001	1.33
Chmp4b	CHM4B_MOUSE	Charged multivesicular body protein 4b	3	＜0.0001	1.33
Cyp20a1	CP20A_MOUSE	Cytochrome P450 20A1	2	＜0.0001	1.37
Cygb	CYGB_MOUSE	Cytoglobin	2	＜0.0001	1.91
Marcks	MARCS_MOUSE	Myristoylated alanine-rich C-kinase substrate	2	＜0.0001	2.1
Agt	Q3UTR7_MOUSE	Angiotensinogen	2	＜0.0001	1.39
Ifi47	Q61635_MOUSE	GTP-binding protein	2	＜0.0001	1.39
Sh3bgrl3	SH3L3_MOUSE	SH3 domain-binding glutamic acid-rich-like protein 3	4	＜0.0001	1.75
Tpm3	E9Q7Q3_MOUSE	Tropomyosin alpha-3 chain	20	＜0.0001	1.6
Alcam	CD166_MOUSE	CD166 antigen	3	＜0.0001	1.39
Luc7l3	LC7L3_MOUSE	Luc7-like protein 3	2	0.0024	1.39
Pfdn6	PFD6_MOUSE	Prefoldin subunit 6	3	＜0.0001	1.33
Zyx	ZYX_MOUSE	Zyxin	2	＜0.0001	1.71
S100a9	S10A9_MOUSE	Protein S100-A9	4	＜0.0001	1.88
Sf3b6	SF3B6_MOUSE	Splicing factor 3B subunit 6	5	＜0.0001	1.41
Prrc2c	A0A0A0MQ79_MOUSE	Protein PRRC2C	2	＜0.0001	1.52
Ddx18	DDX18_MOUSE	ATP-dependent RNA helicase DDX18	2	＜0.0001	1.39
Pdap1	HAP28_MOUSE	28 kDa heat- and acid-stable phosphoprotein	3	＜0.0001	1.43
Srsf6	SRSF6_MOUSE	Serine/arginine-rich splicing factor 6	2	＜0.0001	1.41
Lad1	LAD1_MOUSE	Ladinin-1	2	＜0.0001	1.95
Vcam1	Q3UPN1_MOUSE	Putative uncharacterized protein	2	＜0.0001	1.79
Fermt3	URP2_MOUSE	Fermitin family homolog 3	2	＜0.0001	1.6
S100a13	A0A0A0MQ90_MOUSE	Protein S100-A13	3	＜0.0001	1.45
Las1l	LAS1L_MOUSE	Ribosomal biogenesis protein LAS1L	2	0.0017	1.39
Ifi30	GILT_MOUSE	Gamma-interferon-inducible lysosomal thiol reductase	4	＜0.0001	1.39
Hexa	HEXA_MOUSE	Beta-hexosaminidase subunit alpha	3	＜0.0001	1.42
Mfge8	MFGM_MOUSE	Lactadherin	2	＜0.0001	1.37
Naga	NAGAB_MOUSE	Alpha-N-acetylgalactosaminidase	2	＜0.0001	1.47
Nudcd1	NUDC1_MOUSE	NudC domain-containing protein 1	2	＜0.0001	1.32
Ogfr	OGFR_MOUSE	Opioid growth factor receptor	2	＜0.0001	1.32
Pla2g4a	Q9DBX5_MOUSE	Phospholipase A2	2	＜0.0001	1.64
Apcs	SAMP_MOUSE	Serum amyloid P-component	2	＜0.0001	1.71
Stk10	STK10_MOUSE	Serine/threonine-protein kinase 10	2	＜0.0001	1.42
Scarb2	SCRB2_MOUSE	Lysosome membrane protein 2	2	＜0.0001	1.33
42988	A0A0R4J233_MOUSE	Septin-10	2	0.00071	1.34
Aga	ASPG_MOUSE	N(4)-(beta-N-acetylglucosaminyl)-L-asparaginase	2	＜0.0001	1.33
Bag2	BAG2_MOUSE	BAG family molecular chaperone regulator 2	2	＜0.0001	1.54
Krt5	K2C5_MOUSE	Keratin, type II cytoskeletal 5	2	＜0.0001	1.46
Pawr	PAWR_MOUSE	PRKC apoptosis WT1 regulator protein	2	＜0.0001	1.53
Rhog	RHOG_MOUSE	Rho-related GTP-binding protein RhoG	5	＜0.0001	1.35
Tacstd2	TACD2_MOUSE	Tumor-associated calcium signal transducer 2	2	＜0.0001	1.42
Tp53bp1	TP53B_MOUSE	TP53-binding protein 1	2	＜0.0001	1.49
Ptprc	PTPRC_MOUSE	Receptor-type tyrosine-protein phosphatase C	2	＜0.0001	1.83
Lrrfip2	E9QN52_MOUSE	Leucine-rich repeat flightless-interacting protein 2	2	＜0.0001	1.43
Fbln1	FBLN1_MOUSE	Fibulin-1	2	＜0.0001	1.6
Eif1ax	IF1AX_MOUSE	Eukaryotic translation initiation factor 1A, X-chromosomal	3	＜0.0001	1.36
Itih3	ITIH3_MOUSE	Inter-alpha-trypsin inhibitor heavy chain H3	3	＜0.0001	1.93
Mgst1	MGST1_MOUSE	Microsomal glutathione S-transferase 1	2	＜0.00013	1.41
Psmb8	PSB8_MOUSE	Proteasome subunit beta type-8	2	＜0.0001	1.72
Stam2	STAM2_MOUSE	Signal transducing adapter molecule 2	2	＜0.0001	1.34
Kif2a	E0CZ72_MOUSE	Kinesin-like protein	2	0.0041	1.38
H2afv	H2AV_MOUSE	Histone H2A.V	5	＜0.0001	1.48
Cep170	CE170_MOUSE	Centrosomal protein of 170 kDa	2	0.0013	1.79
Tpm1	TPM1_MOUSE	Tropomyosin alpha-1 chain	6	＜0.00011	2.27
Afap1	AFAP1_MOUSE	Actin filament-associated protein 1	2	＜0.0001	1.36
Aip	AIP_MOUSE	AH receptor-interacting protein	2	＜0.0001	1.33
Bicd2	BICD2_MOUSE	Protein bicaudal D homolog 2	2	＜0.0001	1.38
	CA198_MOUSE	Uncharacterized protein C1orf198 homolog	3	＜0.0001	1.39
Cbx5	CBX5_MOUSE	Chromobox protein homolog 5	2	＜0.0001	1.52
Kank4	KANK4_MOUSE	KN motif and ankyrin repeat domain-containing protein 4	2	0.0021	1.64
Prelp	PRELP_MOUSE	Prolargin	3	＜0.0001	1.35
Lsm5	LSM5_MOUSE	U6 snRNA-associated Sm-like protein LSm5	2	0.015	1.31
Tubb2a	TBB2A_MOUSE	Tubulin beta-2A chain	22	＜0.00014	1.36
Usp25	UBP25_MOUSE	Ubiquitin carboxyl-terminal hydrolase 25	2	0.0054	1.43
Ctss	CATS_MOUSE	Cathepsin S	2	＜0.0001	1.92
Tpm1	G5E8R1_MOUSE	Tropomyosin 1, alpha, isoform CRA_j	6	＜0.0001	1.38
Lsm7	LSM7_MOUSE	U6 snRNA-associated Sm-like protein LSm7	3	＜0.00013	1.44
Nfkb2	NFKB2_MOUSE	Nuclear factor NF-kappa-B p100 subunit	2	＜0.0001	1.42
Rab32	RAB32_MOUSE	Ras-related protein Rab-32	3	＜0.0001	1.46
Rbbp7	RBBP7_MOUSE	Histone-binding protein RBBP7	2	＜0.0001	1.37
Rbm10	RBM10_MOUSE	RNA-binding protein 10	2	＜0.0001	1.34
Polr2c	RPB3_MOUSE	DNA-directed RNA polymerase II subunit RPB3	3	＜0.0001	1.32
Thoc5	THOC5_MOUSE	THO complex subunit 5 homolog	2	0.00092	1.39
Bzw2	BZW2_MOUSE	Basic leucine zipper and W2 domain-containing protein 2	3	0.00053	1.38
Crnkl1	CRNL1_MOUSE	Crooked neck-like protein 1	2	＜0.0001	1.39
Tbc1d2	TBD2A_MOUSE	TBC1 domain family member 2A	2	0.00028	1.46
Bax	A0A1B0GT81_MOUSE	Apoptosis regulator BAX	2	＜0.0001	1.42
Aebp1	AEBP1_MOUSE	Adipocyte enhancer-binding protein 1	2	＜0.0001	1.65
Bmp2k	BMP2K_MOUSE	BMP-2-inducible protein kinase	2	＜0.0001	1.46
Ranbp3	RANB3_MOUSE	Ran-binding protein 3	2	＜0.0001	1.35
Rbpms	RBPMS_MOUSE	RNA-binding protein with multiple splicing	2	＜0.0001	1.6
Rasal2	D3YUS5_MOUSE	RAS protein activator-like 2	2	0.0017	1.41
Lsm4	LSM4_MOUSE	U6 snRNA-associated Sm-like protein LSm4	3	＜0.00011	1.42
Sp100	Q8C405_MOUSE	Nuclear autoantigen Sp-100	2	0.0067	1.31
Rhoc	RHOC_MOUSE	Rho-related GTP-binding protein RhoC	2	0.0047	1.39
Chtop	CHTOP_MOUSE	Chromatin target of PRMT1 protein	2	0.0041	1.51
Ttc28	A0A0A0MQN9_MOUSE	Tetratricopeptide repeat protein 28	2	0.016	1.53
Actbl2	ACTBL_MOUSE	Beta-actin-like protein 2	2	0.0063	1.34
Lgals9	B1AQR8_MOUSE	Galectin	2	＜0.0001	1.4
Cirbp	CIRBP_MOUSE	Cold-inducible RNA-binding protein	2	＜0.0001	1.57
Flnc	FLNC_MOUSE	Filamin-C	6	＜0.0001	1.57
Cd74	HG2A_MOUSE	H-2 class II histocompatibility antigen gamma chain	2	＜0.0001	1.71
Hmgb3	HMGB3_MOUSE	High mobility group protein B3	2	＜0.0001	1.49
Man2b2	MA2B2_MOUSE	Epididymis-specific alpha-mannosidase	2	＜0.0001	1.38
Rcn1	RCN1_MOUSE	Reticulocalbin-1	2	＜0.0001	1.51
Tgfb1i1	TGFI1_MOUSE	Transforming growth factor beta-1-induced transcript 1 protein	2	＜0.0001	1.46
Trmt112	TR112_MOUSE	Multifunctional methyltransferase subunit TRM112-like protein	2	＜0.0001	1.33
Atrx	ATRX_MOUSE	Transcriptional regulator ATRX	2	＜0.0001	1.35
Nup58	NUP58_MOUSE	Nucleoporin p58/p45	2	0.00024	1.33
Snu13	NH2L1_MOUSE	NHP2-like protein 1	4	＜0.0001	1.42
Baiap2l1	BI2L1_MOUSE	Brain-specific angiogenesis inhibitor 1-associated protein 2-like protein 1	2	0.038	1.39
Fmnl2	F8VPR2_MOUSE	Formin-like protein 2	4	0.0022	1.36
Bclaf1	BCLF1_MOUSE	Bcl-2-associated transcription factor 1	2	0.00028	1.45
Reg3b	REG3B_MOUSE	Regenerating islet-derived protein 3-beta	2	0.00035	1.4
Cyp24a1	CP24A_MOUSE	1,25-dihydroxyvitamin D(3) 24-hydroxylase, mitochondrial	2	0.00035	1.61
Smc4	E9Q2X6_MOUSE	Structural maintenance of chromosomes protein	2	0.0039	1.32
Guk1	KGUA_MOUSE	Guanylate kinase	2	＜0.0001	1.31
Manba	MANBA_MOUSE	Beta-mannosidase	2	＜0.0001	1.42
Wbp11	WBP11_MOUSE	WW domain-binding protein 11	2	＜0.0001	1.43
Emd	EMD_MOUSE	Emerin	2	＜0.0001	1.37
Cbr3	CBR3_MOUSE	Carbonyl reductase [NADPH] 3	2	＜0.0001	1.49
Gipc1	GIPC1_MOUSE	PDZ domain-containing protein GIPC1	2	0.00028	1.31
Vps39	VPS39_MOUSE	Vam6/Vps39-like protein	3	0.028	1.36
Cd14	CD14_MOUSE	Monocyte differentiation antigen CD14	4	＜0.0001	2.19
Myo1f	MYO1F_MOUSE	Unconventional myosin-If	2	0.0094	1.59
Vcan	E9PYH0_MOUSE	Versican core protein	3	＜0.00014	1.37
Dhx57	DHX57_MOUSE	Putative ATP-dependent RNA helicase DHX57	2	0.043	1.39
Adnp	ADNP_MOUSE	Activity-dependent neuroprotector homeobox protein	2	0.0021	1.35
Ifi204	E9QKL6_MOUSE	Interferon-activable protein 204	2	＜0.0001	2.03
Exosc7	EXOS7_MOUSE	Exosome complex exonuclease RRP42	2	＜0.0001	1.32
Exosc8	EXOS8_MOUSE	Exosome complex component RRP43	2	＜0.0001	1.41
Gda	GUAD_MOUSE	Guanine deaminase	2	＜0.0001	1.47
Tnpo2	TNPO2_MOUSE	Transportin-2	2	＜0.00019	1.32
Pold1	DPOD1_MOUSE	DNA polymerase delta catalytic subunit	2	0.0045	1.33
Tpd52l2	A2AUD5_MOUSE	Tumor protein D54	6	0.00034	1.38
Trip6	TRIP6_MOUSE	Thyroid receptor-interacting protein 6	2	＜0.0001	1.33
Tmem87a	A2AQJ5_MOUSE	Transmembrane protein 87A	2	＜0.00015	1.32
Snapin	SNAPN_MOUSE	SNARE-associated protein Snapin	3	0.028	1.43
Irf2bpl	I2BPL_MOUSE	Interferon regulatory factor 2-binding protein-like	3	＜0.0001	1.52
Rfc1	A0A0N5E9G7_MOUSE	Replication factor C subunit 1	2	0.0092	1.31
Ints7	INT7_MOUSE	Integrator complex subunit 7	2	0.037	1.42
Mospd2	B1AU74_MOUSE	Motile sperm domain-containing protein 2	2	＜0.0001	1.36
Cnpy4	CNPY4_MOUSE	Protein canopy homolog 4	2	0.0021	1.31
Fetub	FETUB_MOUSE	Fetuin-B	2	＜0.0001	1.84
Itgb2	ITB2_MOUSE	Integrin beta-2	2	＜0.0001	1.91
Plod2	PLOD2_MOUSE	Procollagen-lysine,2-oxoglutarate 5-dioxygenase 2	2	0.00028	1.31
Psmd10	PSD10_MOUSE	26S proteasome non-ATPase regulatory subunit 10	2	＜0.0001	1.35
Spon1	SPON1_MOUSE	Spondin-1	2	＜0.0001	1.85
Dnajc8	DNJC8_MOUSE	DnaJ homolog subfamily C member 8	2	＜0.0001	1.32
Ptgds	PTGDS_MOUSE	Prostaglandin-H2 D-isomerase	4	0.00043	1.44
Tmem173	STING_MOUSE	Stimulator of interferon genes protein	2	0.00034	1.4
Sipa1l1	SI1L1_MOUSE	Signal-induced proliferation-associated 1-like protein 1	2	0.0027	1.39
Trmt61a	TRM61_MOUSE	tRNA (adenine(58)-N(1))-methyltransferase catalytic subunit TRMT61A	2	0.00034	1.36
Rpl22l1	RL22L_MOUSE	60S ribosomal protein L22-like 1	4	＜0.0001	1.45
Spen	A2ADB0_MOUSE	Msx2-interacting protein	2	0.031	1.35
Hk2	E9Q5B5_MOUSE	Hexokinase-2	5	0.0011	1.42
Hook2	A0A1B0GSU8_MOUSE	Protein Hook homolog 2	2	0.019	1.38
Rbm28	RBM28_MOUSE	RNA-binding protein 28	2	＜0.0001	1.56
Zcchc6	E9PUA2_MOUSE	Terminal uridylyltransferase 7	2	＜0.0001	1.47
Cd44	A2APM1_MOUSE	CD44 antigen	2	＜0.0001	2.6
Wdr26	E0CYH4_MOUSE	WD repeat-containing protein 26	2	＜0.0001	1.34
Pbxip1	PBIP1_MOUSE	Pre-B-cell leukemia transcription factor-interacting protein 1	3	0.018	1.39
Tap2	TAP2_MOUSE	Antigen peptide transporter 2	2	＜0.0001	1.43
Tgtp1	TGTP1_MOUSE	T-cell-specific guanine nucleotide triphosphate-binding protein 1	2	＜0.0001	1.47
P2rx4	D3Z5U5_MOUSE	P2X purinoceptor	2	＜0.0001	1.35
Stk4	STK4_MOUSE	Serine/threonine-protein kinase 4	3	＜0.0001	1.4
Pbdc1	PBDC1_MOUSE	Protein PBDC1	2	＜0.0001	1.34
Rab31	Q3TXV4_MOUSE	Putative uncharacterized protein	2	＜0.00012	1.51
Kri1	F6WIU1_MOUSE	Protein KRI1 homolog	2	0.00066	1.43
Spryd7	SPRY7_MOUSE	SPRY domain-containing protein 7	2	＜0.0001	1.47
Lcn2	NGAL_MOUSE	Neutrophil gelatinase-associated lipocalin	2	＜0.0001	2.2
Stat2	STAT2_MOUSE	Signal transducer and activator of transcription 2	2	0.003	1.31
Parp14	PAR14_MOUSE	Poly [ADP-ribose] polymerase 14	2	0.016	1.37
Mrc1	MRC1_MOUSE	Macrophage mannose receptor 1	2	＜0.0001	1.4
Gsdmdc1	GSDMD_MOUSE	Gasdermin-D	2	＜0.0001	1.35
Nxn	NXN_MOUSE	Nucleoredoxin	2	0.0014	1.44
Rrs1	RRS1_MOUSE	Ribosome biogenesis regulatory protein homolog	2	＜0.0001	1.62
Rcor1	A0A140T8R7_MOUSE	REST corepressor 1	2	＜0.00011	1.31
Aoc1	AOC1_MOUSE	Amiloride-sensitive amine oxidase [copper-containing]	2	＜0.0001	1.8
Polr2d	RPB4_MOUSE	DNA-directed RNA polymerase II subunit RPB4	4	0.00039	1.34
Eml3	EMAL3_MOUSE	Echinoderm microtubule-associated protein-like 3	2	0.0014	1.36
Fam3a	I7HPY1_MOUSE	Novel protein	4	0.0056	1.36
Mre11	MRE11_MOUSE	Double-strand break repair protein MRE11	2	0.0013	1.41
Dsg2	DSG2_MOUSE	Desmoglein-2	2	0.047	1.36
Scaf11	E9PZM7_MOUSE	SR-related CTD-associated factor 11	2	0.019	1.43
Cdc73	CDC73_MOUSE	Parafibromin	2	0.00093	1.42
Shc1	SHC1_MOUSE	SHC-transforming protein 1	3	0.0013	1.45
Rras	RRAS_MOUSE	Ras-related protein R-Ras	7	0.0035	1.45
Ngp	NGP_MOUSE	Neutrophilic granule protein	2	＜0.0001	2.11
	YJ005_MOUSE	Uncharacterized protein FLJ45252 homolog	3	＜0.0001	1.32
Akr1b8	ALD2_MOUSE	Aldose reductase-related protein 2	3	＜0.0001	3.05
Exosc3	EXOS3_MOUSE	Exosome complex component RRP40	2	＜0.00011	1.31
Nenf	NENF_MOUSE	Neudesin	2	0.0036	1.34
Ppp4r2	A0A0R4J0U2_MOUSE	Serine/threonine-protein phosphatase 4 regulatory subunit 2	2	0.00024	1.31
Fblim1	FBLI1_MOUSE	Filamin-binding LIM protein 1	2	＜0.00015	1.54
Apod	APOD_MOUSE	Apolipoprotein D	3	＜0.0001	1.39
Nup50	NUP50_MOUSE	Nuclear pore complex protein Nup50	2	＜0.00015	1.51
Rela	TF65_MOUSE	Transcription factor p65	2	0.0047	1.38
Tes	Q3ULB1_MOUSE	Putative uncharacterized protein	2	0.00043	1.57
Sirpa	Q6P6I8_MOUSE	Signal-regulatory protein alpha	2	0.0026	1.32
Vrk1	VRK1_MOUSE	Serine/threonine-protein kinase VRK1	2	0.00039	1.31
Serpina10	ZPI_MOUSE	Protein Z-dependent protease inhibitor	2	0.0015	1.54
Mettl13	MET13_MOUSE	Methyltransferase-like protein 13	2	0.0032	1.39
Praf2	PRAF2_MOUSE	PRA1 family protein 2	3	0.00034	1.38
Ltf	TRFL_MOUSE	Lactotransferrin	2	＜0.0001	1.45
Tmcc3	TMCC3_MOUSE	Transmembrane and coiled-coil domain protein 3	2	＜0.0001	1.52
Sdcbp	Q3TMX0_MOUSE	MCG4375, isoform CRA_b	2	0.038	1.44
Polr3a	B2RXC6_MOUSE	DNA-directed RNA polymerase subunit	2	0.012	1.31
Psmb9	PSB9_MOUSE	Proteasome subunit beta type-9	2	0.0066	1.42
Itgam	Q3U1U4_MOUSE	Integrin alpha-M	2	0.00035	2.11
Wdr3	WDR3_MOUSE	WD repeat-containing protein 3	2	0.031	1.31
Dph6	DPH6_MOUSE	Diphthine--ammonia ligase	2	＜0.0001	1.36
Hcls1	HCLS1_MOUSE	Hematopoietic lineage cell-specific protein	2	＜0.0001	1.6
Pacs1	PACS1_MOUSE	Phosphofurin acidic cluster sorting protein 1	2	0.00035	2.16
Exosc5	EXOS5_MOUSE	Exosome complex component RRP46	2	0.00043	1.34
Rdh11	Q9R1R8_MOUSE	Retinol dehydrogenase 11	2	＜0.0001	1.31
Dda1	DDA1_MOUSE	DET1- and DDB1-associated protein 1	2	＜0.0001	1.55
Rbm3	Q8BG13_MOUSE	Putative uncharacterized protein	2	＜0.0001	2.03
Spg21	SPG21_MOUSE	Maspardin	2	0.004	1.33
Sumo2	SUMO2_MOUSE	Small ubiquitin-related modifier 2	2	0.00022	1.32
Mup1	Q58EV3_MOUSE	Major urinary protein 1	2	0.00024	1.68
	ENV1_MOUSE	MLV-related proviral Env polyprotein	2	＜0.00014	1.55
Smpdl3b	ASM3B_MOUSE	Acid sphingomyelinase-like phosphodiesterase 3b	2	0.00035	1.75
Psap	E9PZ00_MOUSE	Prosaposin	2	＜0.0001	1.46
Kdm3b	B9EKS2_MOUSE	Jumonji domain containing 1B	2	0.012	1.4
Cybb	CY24B_MOUSE	Cytochrome b-245 heavy chain	2	＜0.0001	1.88
Nolc1	NOLC1_MOUSE	Nucleolar and coiled-body phosphoprotein 1	2	＜0.00017	1.31
Pafah1b3	PA1B3_MOUSE	Platelet-activating factor acetylhydrolase IB subunit gamma	2	0.0011	1.46
Fbln2	FBLN2_MOUSE	Fibulin-2	2	0.00044	1.4
Basp1	BASP1_MOUSE	Brain acid soluble protein 1	2	＜0.0001	2.01
Gale	GALE_MOUSE	UDP-glucose 4-epimerase	2	＜0.00012	1.33
Akap8	AKAP8_MOUSE	A-kinase anchor protein 8	2	0.0023	1.37
Lxn	LXN_MOUSE	Latexin	2	0.00081	1.43
Hmgcs2	HMCS2_MOUSE	Hydroxymethylglutaryl-CoA synthase, mitochondrial	2	＜0.0001	1.6
Hmgn5	HMGN5_MOUSE	High mobility group nucleosome-binding domain-containing protein 5	2	＜0.0001	1.47
Gca	GRAN_MOUSE	Grancalcin	2	0.0012	1.45
Plekho2	PKHO2_MOUSE	Pleckstrin homology domain-containing family O member 2	4	0.012	1.47
Eef1akmt2	EFMT2_MOUSE	EEF1A lysine methyltransferase 2	2	0.0023	1.32
H2-K1	HA1W_MOUSE	H-2 class I histocompatibility antigen, K-W28 alpha chain	2	0.025	1.57
Fkbp10	FKB10_MOUSE	Peptidyl-prolyl cis-trans isomerase FKBP10	2	0.0013	2.01
Rab8b	RAB8B_MOUSE	Ras-related protein Rab-8B	4	0.0071	1.39
Fgd5	E9QKY4_MOUSE	FYVE, RhoGEF and PH domain-containing protein 5	2	0.0047	1.38
Sparc	A0A1L1SSH9_MOUSE	SPARC	2	＜0.0001	1.64
Kiaa1522	K1522_MOUSE	Uncharacterized protein KIAA1522	2	0.002	1.39
Srek1	A0A1B0GSR3_MOUSE	Splicing regulatory glutamine/lysine-rich protein 1 (Fragment)	2	＜0.0001	1.43
Pld4	PLD4_MOUSE	Phospholipase D4	2	＜0.0001	1.74
Sarnp	SARNP_MOUSE	SAP domain-containing ribonucleoprotein	2	＜0.0001	1.6
Srsf9	SRSF9_MOUSE	Serine/arginine-rich splicing factor 9	2	＜0.0001	1.41
Sumo1	SUMO1_MOUSE	Small ubiquitin-related modifier 1	2	＜0.0001	1.55
Ybx3	YBOX3_MOUSE	Y-box-binding protein 3	2	＜0.0001	1.54
Cdh6	CADH6_MOUSE	Cadherin-6	2	0.00043	1.52
Mup14	B8JI96_MOUSE	Major urinary protein 14 (Fragment)	2	＜0.0001	2.03
Fkbp11	FKB11_MOUSE	Peptidyl-prolyl cis-trans isomerase FKBP11	2	＜0.0001	1.54
Sf3b5	SF3B5_MOUSE	Splicing factor 3B subunit 5	2	＜0.00011	1.47
Pvr	Q8K094_MOUSE	Poliovirus receptor	3	0.015	1.44
Aldh1a7	AL1A7_MOUSE	Aldehyde dehydrogenase, cytosolic 1	2	0.0031	1.93
Terf2ip	TE2IP_MOUSE	Telomeric repeat-binding factor 2-interacting protein 1	2	0.00093	1.65
Faim	A0A087WRH2_MOUSE	Fas apoptotic inhibitory molecule 1 (Fragment)	2	＜0.0001	1.6
F9	FA9_MOUSE	Coagulation factor IX	2	＜0.0001	1.59
Oxr1	E9Q0A7_MOUSE	Oxidation resistance protein 1	2	0.00093	1.78
Gtf2f1	T2FA_MOUSE	General transcription factor IIF subunit 1	2	0.012	1.34
H2-Aa	HA2D_MOUSE	H-2 class II histocompatibility antigen, A-D alpha chain	2	0.00035	2.64
Eif4e2	D3YUV9_MOUSE	Eukaryotic translation initiation factor 4E type 2	2	0.0041	1.32
Tbc1d2b	TBD2B_MOUSE	TBC1 domain family member 2B	2	0.0031	1.44
Malt1	MALT1_MOUSE	Mucosa-associated lymphoid tissue lymphoma translocation protein 1 homolog	2	0.00035	1.55
Slc6a6	SC6A6_MOUSE	Sodium- and chloride-dependent taurine transporter	2	0.00035	1.74
Crtap	CRTAP_MOUSE	Cartilage-associated protein	2	0.0023	1.51
Pcmtd2	PCMD2_MOUSE	Protein-L-isoaspartate O-methyltransferase domain-containing protein 2	2	0.012	1.39
Marcksl1	MRP_MOUSE	MARCKS-related protein	3	0.012	1.77
Golm1	GOLM1_MOUSE	Golgi membrane protein 1	2	0.0039	1.8
Leng8	D3YWS8_MOUSE	Leukocyte receptor cluster (LRC) member 8, isoform CRA_a	2	0.00084	1.32
Nemp1	E9Q6Z3_MOUSE	Nuclear envelope integral membrane protein 1	2	0.033	1.45
Tprn	TPRN_MOUSE	Taperin	2	＜0.00012	1.39
Tbc1d23	TBC23_MOUSE	TBC1 domain family member 23	2	0.0013	1.32
Ncf2	NCF2_MOUSE	Neutrophil cytosol factor 2	2	0.001	1.74
Kdelc1	KDEL1_MOUSE	KDEL motif-containing protein 1	2	0.0022	1.31
Pxk	PXK_MOUSE	PX domain-containing protein kinase-like protein	2	0.0018	1.37
Bst1	A0A0R4J190_MOUSE	ADP-ribosyl cyclase/cyclic ADP-ribose hydrolase 2	3	0.0095	1.44
Spag7	SPAG7_MOUSE	Sperm-associated antigen 7	2	＜0.0001	1.41
Thy1	A0A1L1SUX8_MOUSE	Thy-1 membrane glycoprotein (Fragment)	2	＜0.00014	1.75
Polr2l	RPAB5_MOUSE	DNA-directed RNA polymerases I, II, and III subunit RPABC5	2	0.00028	1.42
Pld3	PLD3_MOUSE	Phospholipase D3	2	0.00053	1.35
Stk25	STK25_MOUSE	Serine/threonine-protein kinase 25	2	0.00053	1.62
Ncbp3	NCBP3_MOUSE	Nuclear cap-binding protein subunit 3	2	0.012	1.36
Lyar	LYAR_MOUSE	Cell growth-regulating nucleolar protein	2	0.00043	1.48
Fam192a	F192A_MOUSE	Protein FAM192A	2	0.024	1.36
Gm13697	A2AK42_MOUSE	Uncharacterized protein	2	0.0013	1.51
Mbd3	D3YTR4_MOUSE	Methyl-CpG-binding domain protein 3	2	0.00043	1.36
Cdk6	CDK6_MOUSE	Cyclin-dependent kinase 6	2	0.0045	1.32
Lrch3	B2RXP1_MOUSE	Leucine-rich repeat and calponin homology domain-containing protein 3	2	0.0056	1.38
Arg1	ARGI1_MOUSE	Arginase-1	2	＜0.0001	2.3
Grwd1	GRWD1_MOUSE	Glutamate-rich WD repeat-containing protein 1	2	0.0056	1.33
Gtf2e2	T2EB_MOUSE	General transcription factor IIE subunit 2	2	0.012	1.4
Atad2	G3X963_MOUSE	ATPase family AAA domain-containing protein 2	2	0.025	1.45
Ctnnal1	CTNL1_MOUSE	Alpha-catulin	2	0.031	1.35
Cyp1b1	CP1B1_MOUSE	Cytochrome P450 1B1	2	＜0.0001	1.79
Ppp1r37	PPR37_MOUSE	Protein phosphatase 1 regulatory subunit 37	2	0.0067	1.47
Scaf4	Q6PFF0_MOUSE	SR-related CTD-associated factor 4	2	0.0047	1.37
S100a4	A0A0G2JGD2_MOUSE	Protein S100-A4 (Fragment)	2	＜0.0001	2.17
Copz2	COPZ2_MOUSE	Coatomer subunit zeta-2	2	0.015	1.36
Nelfe	NELFE_MOUSE	Negative elongation factor E	2	0.00066	1.95
Bin2	BIN2_MOUSE	Bridging integrator 2	2	0.031	1.84
Ncapd2	A0A0R4J0H7_MOUSE	Condensin complex subunit 1	2	0.0092	1.38
Rprd1a	RPR1A_MOUSE	Regulation of nuclear pre-mRNA domain-containing protein 1A	2	0.0065	1.34
Pes1	PESC_MOUSE	Pescadillo homolog	2	0.047	1.32
Psmg3	PSMG3_MOUSE	Proteasome assembly chaperone 3	2	0.0054	1.55
Fbxo6	FBX6_MOUSE	F-box only protein 6	2	＜0.0001	1.52
Sh2d4a	SH24A_MOUSE	SH2 domain-containing protein 4A	2	0.00035	1.55
Hdgfl3	HDGR3_MOUSE	Hepatoma-derived growth factor-related protein 3	2	0.00035	1.41
Tor3a	TOR3A_MOUSE	Torsin-3A	2	0.0039	1.46
Ctdp1	CTDP1_MOUSE	RNA polymerase II subunit A C-terminal domain phosphatase	2	0.037	1.39
Epm2aip1	EPMIP_MOUSE	EPM2A-interacting protein 1	2	0.0023	1.51
Snx30	SNX30_MOUSE	Sorting nexin-30	2	0.0032	1.37
Rwdd1	RWDD1_MOUSE	RWD domain-containing protein 1	2	0.0018	1.41
Lsp1	A2A6J4_MOUSE	Lymphocyte-specific protein 1	2	＜0.00014	1.8
Loxl2	LOXL2_MOUSE	Lysyl oxidase homolog 2	2	＜0.0001	2.13
Tra2a	A0A0N4SVC2_MOUSE	Transformer-2 protein homolog alpha	2	0.00046	1.4
Mprip	MPRIP_MOUSE	Myosin phosphatase Rho-interacting protein	5	0.0015	1.4
Serinc3	SERC3_MOUSE	Serine incorporator 3	2	0.0079	1.43
Cdh11	CAD11_MOUSE	Cadherin-11	2	0.0005	1.4
Polr2f	RPAB2_MOUSE	DNA-directed RNA polymerases I, II, and III subunit RPABC2	2	0.0071	1.54
Kdelc2	G5E897_MOUSE	KDEL (Lys-Asp-Glu-Leu) containing 2, isoform CRA_b	2	0.00049	1.39
Smad4	SMAD4_MOUSE	Mothers against decapentaplegic homolog 4	2	0.00035	1.43
Utp3	SAS10_MOUSE	Something about silencing protein 10	2	0.015	1.43
Lnp	LNP_MOUSE	Protein lunapark	2	0.0013	1.33
Slc25a30	KMCP1_MOUSE	Kidney mitochondrial carrier protein 1	2	0.0041	1.45
Tsen34	H7BX14_MOUSE	tRNA-splicing endonuclease subunit Sen34	2	0.0092	1.35
Dctpp1	DCTP1_MOUSE	dCTP pyrophosphatase 1	2	0.0027	1.34
Rnaseh2c	RNH2C_MOUSE	Ribonuclease H2 subunit C	2	0.0071	1.44
Gas6	GAS6_MOUSE	Growth arrest-specific protein 6	2	0.0039	1.43
Fndc3b	A0A0R4J0H8_MOUSE	Fibronectin type III domain-containing protein 3B	2	0.031	1.58
Rnaseh2b	RNH2B_MOUSE	Ribonuclease H2 subunit B	2	0.01	1.42
Dtnbp1	DTBP1_MOUSE	Dysbindin	2	0.0066	1.33
Rwdd4	RWDD4_MOUSE	RWD domain-containing protein 4	2	0.00049	1.51
Ints9	A0A0R4J0J5_MOUSE	Integrator complex subunit 9	2	0.038	1.4
Zc3h4	A0A1B0GRU3_MOUSE	Zinc finger CCCH domain-containing protein 4	2	0.00035	1.56
Smyd5	SMYD5_MOUSE	SET and MYND domain-containing protein 5	2	0.0023	1.45
Ttc39b	TT39B_MOUSE	Tetratricopeptide repeat protein 39B	2	0.00035	1.53
Rpp25l	RP25L_MOUSE	Ribonuclease P protein subunit p25-like protein	2	0.00067	1.39
Lsm6	LSM6_MOUSE	U6 snRNA-associated Sm-like protein LSm6	2	0.0092	1.4
Ntn4	NET4_MOUSE	Netrin-4	2	0.0017	1.55
Gng5	GBG5_MOUSE	Guanine nucleotide-binding protein G(I)/G(S)/G(O) subunit gamma-5	2	0.037	1.59
Gmfg	GMFG_MOUSE	Glia maturation factor gamma	2	0.037	1.39
Fam96b	F8WHV1_MOUSE	Mitotic spindle-associated MMXD complex subunit MIP18	2	0.0013	1.39
Snx15	D3Z479_MOUSE	Sorting nexin-15	2	0.019	1.39
Gtf2a1	TF2AA_MOUSE	Transcription initiation factor IIA subunit 1	2	0.019	1.53
Cdkn2aipnl	C2AIL_MOUSE	CDKN2AIP N-terminal-like protein	2	0.00093	2.5
Fcgr2b	A0A0B4J1E6_MOUSE	Fc receptor, IgG, low affinity IIb	2	0.00093	1.66
Cldn4	CLD4_MOUSE	Claudin-4	2	0.0013	1.74
Rhob	RHOB_MOUSE	Rho-related GTP-binding protein RhoB	2	0.025	1.47
Vwa3a	VWA3A_MOUSE	von Willebrand factor A domain-containing protein 3A	2	0.0071	1.43
Mt1	MT1_MOUSE	Metallothionein-1	2	0.00035	1.8
Fhl3	F2Z455_MOUSE	Four and a half LIM domains protein 3	2	0.0031	1.39
Paip2	PAIP2_MOUSE	Polyadenylate-binding protein-interacting protein 2	2	0.0023	1.31
Glipr2	GAPR1_MOUSE	Golgi-associated plant pathogenesis-related protein 1	2	0.0039	1.99
Tma16	TMA16_MOUSE	Translation machinery-associated protein 16	2	0.0039	1.55
Hdgfl2	HDGR2_MOUSE	Hepatoma-derived growth factor-related protein 2	2	0.037	1.4
Rabepk	B0R0S4_MOUSE	Rab9 effector protein with kelch motifs	2	0.037	1.37
Crlf3	CRLF3_MOUSE	Cytokine receptor-like factor 3	2	0.0065	1.47
Atp1a1	AT1A1_MOUSE	Sodium/potassium-transporting ATPase subunit alpha-1	28	＜0.0001	-1.32
Hbbt1	A8DUK4_MOUSE	Beta-globin	32	＜0.0001	-1.57
Acsm2	ACSM2_MOUSE	Acyl-coenzyme A synthetase ACSM2, mitochondrial	26	＜0.0001	-1.58
Aco2	ACON_MOUSE	Aconitate hydratase, mitochondrial	24	＜0.0001	-1.38
Ass1	ASSY_MOUSE	Argininosuccinate synthase	22	＜0.0001	-1.52
Pcx	E9QPD7_MOUSE	Pyruvate carboxylase	2	＜0.0001	-1.39
Sdha	SDHA_MOUSE	Succinate dehydrogenase [ubiquinone] flavoprotein subunit, mitochondrial	22	＜0.0001	-1.31
Ehhadh	ECHP_MOUSE	Peroxisomal bifunctional enzyme	23	＜0.0001	-1.42
Aldh6a1	MMSA_MOUSE	Methylmalonate-semialdehyde dehydrogenase [acylating], mitochondrial	22	＜0.0001	-1.43
Acy3	ACY3_MOUSE	N-acyl-aromatic-L-amino acid amidohydrolase (carboxylate-forming)	23	＜0.0001	-1.47
Fbp1	F16P1_MOUSE	Fructose-1,6-bisphosphatase 1	29	＜0.0001	-1.35
Cat	CATA_MOUSE	Catalase	29	＜0.0001	-1.35
Acadm	ACADM_MOUSE	Medium-chain specific acyl-CoA dehydrogenase, mitochondrial	26	＜0.0001	-1.43
Aldh4a1	AL4A1_MOUSE	Delta-1-pyrroline-5-carboxylate dehydrogenase, mitochondrial	24	＜0.0001	-1.35
Gatm	GATM_MOUSE	Glycine amidinotransferase, mitochondrial	23	＜0.0001	-1.45
Acox1	ACOX1_MOUSE	Peroxisomal acyl-coenzyme A oxidase 1	23	＜0.0001	-1.37
Acat1	THIL_MOUSE	Acetyl-CoA acetyltransferase, mitochondrial	20	＜0.0001	-1.41
Pdzk1	A0A0R4J1V0_MOUSE	Na(+)/H(+) exchange regulatory cofactor NHE-RF3	8	＜0.0001	-1.37
Ndufs1	NDUS1_MOUSE	NADH-ubiquinone oxidoreductase 75 kDa subunit, mitochondrial	8	＜0.0001	-1.34
Slc25a3	G5E902_MOUSE	MCG10343, isoform CRA_b	26	＜0.0001	-1.36
Ndufs2	NDUS2_MOUSE	NADH dehydrogenase [ubiquinone] iron-sulfur protein 2, mitochondrial	20	＜0.0001	-1.33
Akr1c21	AK1CL_MOUSE	Aldo-keto reductase family 1 member C21	24	＜0.0001	-1.39
Aldh9a1	AL9A1_MOUSE	4-trimethylaminobutyraldehyde dehydrogenase	7	＜0.0001	-1.36
Hba-a1	Q91VB8_MOUSE	Alpha globin 1	2	＜0.0001	-1.64
Ldhd	LDHD_MOUSE	Probable D-lactate dehydrogenase, mitochondrial	27	＜0.0001	-1.31
Idh2	IDHP_MOUSE	Isocitrate dehydrogenase [NADP], mitochondrial	22	＜0.0001	-1.39
Sord	DHSO_MOUSE	Sorbitol dehydrogenase	20	＜0.0001	-1.42
Me1	MAOX_MOUSE	NADP-dependent malic enzyme	8	＜0.0001	-1.39
Gpd1	E0CXN5_MOUSE	Glycerol-3-phosphate dehydrogenase [NAD(+)]	9	＜0.0001	-1.35
Scp2	NLTP_MOUSE	Non-specific lipid-transfer protein	20	＜0.0001	-1.35
Hadh	HCDH_MOUSE	Hydroxyacyl-coenzyme A dehydrogenase, mitochondrial	22	＜0.0001	-1.39
Khk	A0A0J9YU79_MOUSE	Ketohexokinase	7	＜0.0001	-1.31
Nnt	NNTM_MOUSE	NAD(P) transhydrogenase, mitochondrial	8	＜0.0001	-1.34
Ces1f	CES1F_MOUSE	Carboxylesterase 1F	23	＜0.0001	-1.54
Ndufv1	D3YUM1_MOUSE	NADH dehydrogenase [ubiquinone] flavoprotein 1, mitochondrial	7	＜0.0001	-1.34
Acsm3	ACSM3_MOUSE	Acyl-coenzyme A synthetase ACSM3, mitochondrial	9	＜0.0001	-1.46
Ephx2	HYES_MOUSE	Bifunctional epoxide hydrolase 2	6	＜0.0001	-1.44
	QORL2_MOUSE	Quinone oxidoreductase-like protein 2	8	＜0.0001	-1.41
Aldh7a1	AL7A1_MOUSE	Alpha-aminoadipic semialdehyde dehydrogenase	8	＜0.0001	-1.31
Glyat	GLYAT_MOUSE	Glycine N-acyltransferase	22	＜0.0001	-1.34
Nudt19	NUD19_MOUSE	Nucleoside diphosphate-linked moiety X motif 19	20	＜0.0001	-1.45
Mccc1	MCCA_MOUSE	Methylcrotonoyl-CoA carboxylase subunit alpha, mitochondrial	6	＜0.0001	-1.31
Amacr	AMACR_MOUSE	Alpha-methylacyl-CoA racemase	8	＜0.0001	-1.46
Bdh1	BDH_MOUSE	D-beta-hydroxybutyrate dehydrogenase, mitochondrial	20	＜0.0001	-1.35
Aldh8a1	AL8A1_MOUSE	Aldehyde dehydrogenase family 8 member A1	23	＜0.0001	-1.41
Acads	ACADS_MOUSE	Short-chain specific acyl-CoA dehydrogenase, mitochondrial	6	＜0.0001	-1.35
Pccb	PCCB_MOUSE	Propionyl-CoA carboxylase beta chain, mitochondrial	8	＜0.0001	-1.35
Bphl	BPHL_MOUSE	Valacyclovir hydrolase	22	＜0.0001	-1.39
Pecr	PECR_MOUSE	Peroxisomal trans-2-enoyl-CoA reductase	22	＜0.0001	-1.55
Sucla2	SUCB1_MOUSE	Succinate--CoA ligase [ADP-forming] subunit beta, mitochondrial	8	＜0.0001	-1.33
Keg1	KEG1_MOUSE	Glycine N-acyltransferase-like protein Keg1	8	＜0.0001	-1.33
Hgd	HGD_MOUSE	Homogentisate 1,2-dioxygenase	8	＜0.0001	-1.43
Cyp4b1	CP4B1_MOUSE	Cytochrome P450 4B1	6	＜0.0001	-1.56
Acsl1	ACSL1_MOUSE	Long-chain-fatty-acid--CoA ligase 1	6	＜0.0001	-1.33
	CK054_MOUSE	Ester hydrolase C11orf54 homolog	6	＜0.0001	-1.37
Gk	B1ASZ3_MOUSE	Glycerol kinase	22	＜0.0001	-1.37
Sardh	SARDH_MOUSE	Sarcosine dehydrogenase, mitochondrial	6	＜0.0001	-1.35
Slc25a4	ADT1_MOUSE	ADP/ATP translocase 1	9	＜0.0001	-1.32
Hsd17b11	DHB11_MOUSE	Estradiol 17-beta-dehydrogenase 11	25	＜0.0001	-1.65
Atp1b1	AT1B1_MOUSE	Sodium/potassium-transporting ATPase subunit beta-1	8	＜0.0001	-1.34
Mut	MUTA_MOUSE	Methylmalonyl-CoA mutase, mitochondrial	20	＜0.0001	-1.35
Shmt2	Q3TFD0_MOUSE	Serine hydroxymethyltransferase	9	＜0.0001	-1.4
Sdhb	SDHB_MOUSE	Succinate dehydrogenase [ubiquinone] iron-sulfur subunit, mitochondrial	9	＜0.0001	-1.35
Adh1	ADH1_MOUSE	Alcohol dehydrogenase 1	22	＜0.0001	-1.42
Ndufa10	NDUAA_MOUSE	NADH dehydrogenase [ubiquinone] 1 alpha subcomplex subunit 10, mitochondrial	7	＜0.0001	-1.33
Lactb2	LACB2_MOUSE	Endoribonuclease LACTB2	6	＜0.0001	-1.42
Miox	MIOX_MOUSE	Inositol oxygenase	20	＜0.0001	-1.52
Acox3	ACOX3_MOUSE	Peroxisomal acyl-coenzyme A oxidase 3	7	＜0.0001	-1.53
Dhrs4	DHRS4_MOUSE	Dehydrogenase/reductase SDR family member 4	22	＜0.0001	-1.35
Pah	PH4H_MOUSE	Phenylalanine-4-hydroxylase	6	＜0.0001	-1.56
Sfxn1	SFXN1_MOUSE	Sideroflexin-1	7	＜0.0001	-1.34
Dmgdh	M2GD_MOUSE	Dimethylglycine dehydrogenase, mitochondrial	7	＜0.0001	-1.39
Abat	GABT_MOUSE	4-aminobutyrate aminotransferase, mitochondrial	9	＜0.0001	-1.35
Hibadh	3HIDH_MOUSE	3-hydroxyisobutyrate dehydrogenase, mitochondrial	6	＜0.0001	-1.39
Pbld1	K3W4L7_MOUSE	Phenazine biosynthesis-like domain-containing protein 1	5	＜0.0001	-1.31
Slc25a13	CMC2_MOUSE	Calcium-binding mitochondrial carrier protein Aralar2	9	＜0.0001	-1.34
Gcdh	A0A0A0MQ68_MOUSE	Glutaryl-CoA dehydrogenase, mitochondrial	6	＜0.0001	-1.32
Dbt	ODB2_MOUSE	Lipoamide acyltransferase component of branched-chain alpha-keto acid dehydrogenase complex, mitochondrial	6	＜0.0001	-1.38
Akr1c14	Q91WT7_MOUSE	3-alpha-hydroxysteroid dehydrogenase type 1	8	＜0.0001	-1.46
Slc3a1	SLC31_MOUSE	Neutral and basic amino acid transport protein rBAT	6	＜0.0001	-1.48
Ces1d	CES1D_MOUSE	Carboxylesterase 1D	5	＜0.0001	-1.47
Agps	ADAS_MOUSE	Alkyldihydroxyacetonephosphate synthase, peroxisomal	6	＜0.0001	-1.34
Acsm1	ACSM1_MOUSE	Acyl-coenzyme A synthetase ACSM1, mitochondrial	8	＜0.0001	-1.39
Ces2c	EST2C_MOUSE	Acylcarnitine hydrolase	7	＜0.0001	-1.49
Mep1b	MEP1B_MOUSE	Meprin A subunit beta	6	＜0.0001	-1.32
Slc25a10	DIC_MOUSE	Mitochondrial dicarboxylate carrier	6	＜0.0001	-1.39
Inmt	INMT_MOUSE	Indolethylamine N-methyltransferase	6	＜0.0001	-1.39
Slc25a11	M2OM_MOUSE	Mitochondrial 2-oxoglutarate/malate carrier protein	6	＜0.0001	-1.35
Acad10	ACD10_MOUSE	Acyl-CoA dehydrogenase family member 10	4	＜0.0001	-1.36
Agxt2	AGT2_MOUSE	Alanine--glyoxylate aminotransferase 2, mitochondrial	6	＜0.0001	-1.38
Pvalb	PRVA_MOUSE	Parvalbumin alpha	6	＜0.0001	-1.4
Ivd	IVD_MOUSE	Isovaleryl-CoA dehydrogenase, mitochondrial	6	＜0.0001	-1.39
Sod2	SODM_MOUSE	Superoxide dismutase [Mn], mitochondrial	8	＜0.0001	-1.31
Ugt3a2	UD3A2_MOUSE	UDP-glucuronosyltransferase 3A2	9	＜0.0001	-1.39
Acad8	A0A0R4J0P1_MOUSE	Acyl-Coenzyme A dehydrogenase family, member 8	6	＜0.0001	-1.31
Cd36	CD36_MOUSE	Platelet glycoprotein 4	22	＜0.0001	-1.45
Aldh5a1	SSDH_MOUSE	Succinate-semialdehyde dehydrogenase, mitochondrial	4	＜0.0001	-1.34
Cmbl	CMBL_MOUSE	Carboxymethylenebutenolidase homolog	6	＜0.0001	-1.45
Fahd1	FAHD1_MOUSE	Acylpyruvase FAHD1, mitochondrial	6	＜0.0001	-1.33
Aacs	AACS_MOUSE	Acetoacetyl-CoA synthetase	5	＜0.0001	-1.59
Cbs	CBS_MOUSE	Cystathionine beta-synthase	7	＜0.0001	-1.35
S100g	S100G_MOUSE	Protein S100-G	6	＜0.0001	-1.34
Glul	GLNA_MOUSE	Glutamine synthetase	6	＜0.0001	-1.4
Bcat2	A0A1B0GX27_MOUSE	Branched-chain-amino-acid aminotransferase	6	＜0.0001	-1.34
Acmsd	ACMSD_MOUSE	2-amino-3-carboxymuconate-6-semialdehyde decarboxylase	5	＜0.0001	-1.47
Csad	CSAD_MOUSE	Cysteine sulfinic acid decarboxylase	5	＜0.0001	-1.41
Tst	THTR_MOUSE	Thiosulfate sulfurtransferase	5	＜0.0001	-1.48
Auh	A0A0R4J023_MOUSE	Methylglutaconyl-CoA hydratase, mitochondrial	5	＜0.0001	-1.36
Cisd1	CISD1_MOUSE	CDGSH iron-sulfur domain-containing protein 1	9	＜0.0001	-1.34
L2hgdh	L2HDH_MOUSE	L-2-hydroxyglutarate dehydrogenase, mitochondrial	6	＜0.0001	-1.36
Mtch2	MTCH2_MOUSE	Mitochondrial carrier homolog 2	7	＜0.0001	-1.39
Acot13	ACO13_MOUSE	Acyl-coenzyme A thioesterase 13	6	＜0.0001	-1.43
Slco1a1	SO1A1_MOUSE	Solute carrier organic anion transporter family member 1A1	7	＜0.0001	-1.72
Cyp51a1	CP51A_MOUSE	Lanosterol 14-alpha demethylase	6	＜0.0001	-1.39
Coasy	COASY_MOUSE	Bifunctional coenzyme A synthase	6	＜0.0001	-1.4
Usmg5	USMG5_MOUSE	Up-regulated during skeletal muscle growth protein 5	2	＜0.0001	-1.34
Dao	A0A0R4J203_MOUSE	D-amino-acid oxidase	4	＜0.0001	-1.39
Cyp2e1	CP2E1_MOUSE	Cytochrome P450 2E1	5	＜0.0001	-1.39
Pyroxd2	PYRD2_MOUSE	Pyridine nucleotide-disulfide oxidoreductase domain-containing protein 2	5	＜0.0001	-1.37
Bcat1	BCAT1_MOUSE	Branched-chain-amino-acid aminotransferase, cytosolic	6	＜0.0001	-1.33
Nipsnap1	NIPS1_MOUSE	Protein NipSnap homolog 1	6	＜0.0001	-1.39
Atp5j2	ATPK_MOUSE	ATP synthase subunit f, mitochondrial	6	＜0.0001	-1.52
Aspdh	ASPD_MOUSE	Putative L-aspartate dehydrogenase	4	＜0.0001	-1.34
Cyp7b1	CP7B1_MOUSE	25-hydroxycholesterol 7-alpha-hydroxylase	5	＜0.0001	-1.58
Slc17a3	G5E894_MOUSE	Solute carrier family 17 (Sodium phosphate), member 3, isoform CRA_c	9	＜0.0001	-1.43
Slc22a12	A0A0R4J1I9_MOUSE	Solute carrier family 22 (Organic anion/cation transporter), member 12, isoform CRA_b	3	＜0.0001	-1.38
Ndufs7	NDUS7_MOUSE	NADH dehydrogenase [ubiquinone] iron-sulfur protein 7, mitochondrial	6	＜0.0001	-1.34
Slco1a6	SO1A6_MOUSE	Solute carrier organic anion transporter family member 1A6	4	＜0.0001	-1.66
Mpc2	MPC2_MOUSE	Mitochondrial pyruvate carrier 2	6	＜0.0001	-1.32
Gnpat	GNPAT_MOUSE	Dihydroxyacetone phosphate acyltransferase	4	＜0.0001	-1.32
Slc5a8	SC5A8_MOUSE	Sodium-coupled monocarboxylate transporter 1	6	＜0.0001	-1.46
Cyp2a4	CP2A4_MOUSE	Cytochrome P450 2A4	6	＜0.0001	-1.52
Car12	A0A0R4J0W4_MOUSE	Carbonic anhydrase 12	2	＜0.0001	-1.4
Ak4	KAD4_MOUSE	Adenylate kinase 4, mitochondrial	6	＜0.0001	-1.42
Slc4a1	B3AT_MOUSE	Band 3 anion transport protein	3	＜0.0001	-1.4
Slc22a1	S22A1_MOUSE	Solute carrier family 22 member 1	5	＜0.0001	-1.42
Slc6a19	S6A19_MOUSE	Sodium-dependent neutral amino acid transporter B(0)AT1	4	＜0.0001	-1.55
Slc22a6	S22A6_MOUSE	Solute carrier family 22 member 6	6	＜0.0001	-1.66
Hsd3b3	3BHS3_MOUSE	3 beta-hydroxysteroid dehydrogenase/Delta 5-->4-isomerase type 3	2	＜0.0001	-1.38
Pdzk1	NHRF3_MOUSE	Na(+)/H(+) exchange regulatory cofactor NHE-RF3	8	0.00049	-1.66
Ca3	CAH3_MOUSE	Carbonic anhydrase 3	3	＜0.0001	-1.42
Sugct	SUCHY_MOUSE	Succinate--hydroxymethylglutarate CoA-transferase	3	＜0.0001	-1.35
Ugt3a1	UD3A1_MOUSE	UDP-glucuronosyltransferase 3A1	7	＜0.0001	-1.48
Slc22a2	S22A2_MOUSE	Solute carrier family 22 member 2	4	＜0.0001	-1.6
Tfrc	TFR1_MOUSE	Transferrin receptor protein 1	4	＜0.0001	-1.32
Slc22a28	B2RT89_MOUSE	Predicted gene, EG434674	5	＜0.0001	-1.66
Mtco1	COX1_MOUSE	Cytochrome c oxidase subunit 1	7	0.00084	-1.31
Slc22a18	A0A0R4J0P7_MOUSE	Solute carrier family 22 member 18	5	＜0.0001	-1.41
Ugt2b38	Q91WH2_MOUSE	MCG131371	3	＜0.0001	-1.66
Retsat	RETST_MOUSE	All-trans-retinol 13,14-reductase	3	＜0.0001	-1.33
Kap	A0A0N4SWB4_MOUSE	Kidney androgen-regulated protein	2	0.00021	-1.32
Scrn3	SCRN3_MOUSE	Secernin-3	4	＜0.0001	-1.33
Anxa13	ANX13_MOUSE	Annexin A13	4	＜0.0001	-1.33
Phyh	PAHX_MOUSE	Phytanoyl-CoA dioxygenase, peroxisomal	4	＜0.0001	-1.34
Cml1	CMLO1_MOUSE	Probable N-acetyltransferase CML1	4	＜0.0001	-1.39
Afmid	KFA_MOUSE	Kynurenine formamidase	2	＜0.0001	-1.35
Nat8f3	A0A0R4J157_MOUSE	Uncharacterized protein	2	＜0.0001	-1.6
Ca14	CAH14_MOUSE	Carbonic anhydrase 14	5	＜0.0001	-1.4
Hsd3b2	3BHS2_MOUSE	3 beta-hydroxysteroid dehydrogenase/Delta 5-->4-isomerase type 2	6	＜0.0001	-1.39
Slc22a7	A0A0R4J122_MOUSE	Solute carrier family 22 member 7	2	＜0.0001	-1.42
Slc25a21	ODC_MOUSE	Mitochondrial 2-oxodicarboxylate carrier	2	＜0.0001	-1.34
Atp5e	ATP5E_MOUSE	ATP synthase subunit epsilon, mitochondrial	2	0.00034	-1.48
Slc37a4	A0A1L1SUI3_MOUSE	Solute carrier family 37 (glucose-6-phosphate transporter), member 4	2	＜0.0001	-1.33
Slc22a8	S22A8_MOUSE	Solute carrier family 22 member 8	2	＜0.00012	-1.34
Mpc1	MPC1_MOUSE	Mitochondrial pyruvate carrier 1	3	0.0054	-1.38
Acox1	A2A848_MOUSE	Peroxisomal acyl-coenzyme A oxidase 1 (Fragment)	23	0.00043	-1.38
Gpt	ALAT1_MOUSE	Alanine aminotransferase 1	2	＜0.0001	-1.33
Ca4	CAH4_MOUSE	Carbonic anhydrase 4	2	＜0.0001	-1.47
Hmgcr	HMDH_MOUSE	3-hydroxy-3-methylglutaryl-coenzyme A reductase	2	＜0.0001	-1.54
Mtnd1	NU1M_MOUSE	NADH-ubiquinone oxidoreductase chain 1	3	＜0.0001	-1.42
Mpv17	D3YWI4_MOUSE	Protein Mpv17	2	0.00034	-1.33
Fam151a	F151A_MOUSE	Protein FAM151A	2	＜0.0001	-1.42
Sipa1l3	SI1L3_MOUSE	Signal-induced proliferation-associated 1-like protein 3	2	0.025	-1.48
Ecsit	A0A0R4J174_MOUSE	Evolutionarily conserved-signaling intermediate in Toll pathway, mitochondrial	2	0.0056	-1.31
Slc7a8	LAT2_MOUSE	Large neutral amino acids transporter small subunit 2	2	0.047	-1.38
Entpd2	ENTP2_MOUSE	Ectonucleoside triphosphate diphosphohydrolase 2	2	0.025	-1.36
Slc22a19	S22AJ_MOUSE	Solute carrier family 22 (Organic anion transporter), member 19	2	＜0.0001	-1.65
Dnajc6	AUXI_MOUSE	Putative tyrosine-protein phosphatase auxilin	2	0.0017	-1.35
Csl	Q80X68_MOUSE	Citrate synthase	2	0.0039	-1.61
Slc22a26	E9Q6M5_MOUSE	Solute carrier family 22 (organic cation transporter), member 26	2	＜0.00011	-1.34
Akr1c6	DHB5_MOUSE	Estradiol 17 beta-dehydrogenase 5	2	0.00049	-1.35
Slc25a45	S2545_MOUSE	Solute carrier family 25 member 45	2	0.0041	-1.33
Sypl2	SYPL2_MOUSE	Synaptophysin-like protein 2	2	0.0036	-1.51
Slc6a20b	S620B_MOUSE	Sodium- and chloride-dependent transporter XTRP3B	2	0.0013	-1.46
Kl	KLOT_MOUSE	Klotho	2	0.0039	-1.67
Nat8	NAT8_MOUSE	N-acetyltransferase 8	7	0.00034	-1.47
Atp5s	ATP5S_MOUSE	ATP synthase subunit s, mitochondrial	2	0.031	-1.45
Mapkap1	SIN1_MOUSE	Target of rapamycin complex 2 subunit MAPKAP1	2	0.015	-1.35
Opa1	F6U775_MOUSE	Dynamin-like 120 kDa protein, mitochondrial (Fragment)	5	0.01	-1.39

## Sheet: metabolites
Metabolites	kegg ID or HMDB ID	Identification	adjusted P.Value(Crystal group-Control group)	Fold.Change(Crystal group/Control group)
Trimethylamine N-oxide	C01104	MS/MS	0.0037032	9.06845
L-Alanine	C00041	MS/MS	0.00146089	1.74959
Lactic acid	C00256	MS	0.00210418	-1.3962
Uracil	C00106	MS	0.00463528	1.31631
Fumaric acid	C00122	MS	4.00391e-05	1.71118
Guanidineacetic acid	C00581	MS	6.83374e-08	-4.91381
Betaine	C00719	MS/MS	2.08793e-05	-1.80079
L-Cysteine	C00097	MS/MS	3.67651e-05	22.9427
Niacinamide	C00153	MS/MS	1.53081e-07	-1.86346
Taurine	C00245	MS/MS	0.00017627	1.90226
2-Hydroxyethanesulfonate	C05123	MS/MS	0.00121441	4.59639
Hydrouracil	C00429	MS	0.000708369	2.71198
2-Pyrrolidone-5-carboxylic acid	C02237	MS/MS	3.03886e-05	-2.09372
Creatine	C00300	MS/MS	0.00146863	1.93857
L-Asparagine	C00152	MS/MS	0.00356169	1.36226
L-Malic acid	C00149	MS	0.00130423	-1.40065
Ectoine	C06231	MS/MS	0.0155488	3.67876
Proline betaine	C10172	MS	0.0265089	1.67216
4-Guanidinobutanoic acid	C01035	MS	0.00748396	1.93016
3-Dehydroxycarnitine	C05543	MS/MS	0.000147963	1.56887
L-Glutamate	C00025	MS/MS	0.000172437	-1.3199
2-Hydroxyglutarate	C02630	MS/MS	0.00832179	2.62288
Guanine	C00242	MS/MS	0.0107971	-5.35891
3-Pyrimidin-2-yl-Propionic Acid	3-Pyrimidin-2-yl-Propionic Acid	MS/MS	0.00438341	14.5769
Allantoin	C01551	MS/MS	0.000187773	8.26941
Acetyl-DL-Valine	HMDB0011757	MS	0.0121721	1.77322
Valerylglycine	HMDB0000927	MS/MS	0.00553204	1.75243
METHACHOLINE	C07471	MS/MS	0.00944354	2.68297
N(6)-Methyllysine	C02728	MS/MS	0.00200187	3.22675
L-Carnitine	C00318	MS/MS	5.51269e-05	1.46421
Acetyltaurine	Acetyltaurine	MS/MS	0.000190545	3.25671
Uric acid	C00366	MS	0.00671617	1.47229
3-Methyl-L-histidine	C01152	MS/MS	0.000372802	1.84203
Glycylproline	HMDB0000721	MS	0.000529607	-1.44591
Phenyl sulfate	C00850	MS/MS	0.000979441	38.1093
N2-Acetyl-L-ornithine	C00437	MS	0.00834473	1.52743
Indoleacetic acid	C00954	MS	7.58567e-06	1.90572
Citrulline	C00327	MS/MS	0.0111038	2.34966
L-Ascorbic acid	C01041	MS/MS	0.000846078	1.65912
Serotonin	C00780	MS	0.000336003	-2.05753
Hippuric acid	C01586	MS/MS	0.0107479	5.88109
D-Mannitol	C00392	MS/MS	0.00209413	-5.42863
Phosphocholine	C00588	MS/MS	0.0191738	2.2224
Nonanedioic acid	C08261	MS/MS	0.000796272	2.25817
N6-Acetyl-L-lysine	C02727	MS/MS	0.000104828	-1.95465
N6,N6,N6-Trimethyllysine	C03793	MS	0.00407378	1.3795
Kynurenic acid	C01717	MS/MS	1.5085e-05	15.5078
S-Prenyl-L-cysteine	C06751	MS	1.62345e-05	1.67877
L-Homocitrulline	C02427	MS	0.00258554	4.59211
N-Acetyl-L-methionine	C02712	MS	0.00301949	1.50437
Citric acid	C00158	MS	0.000622137	47.3486
Phenylacetylglycine	C05598	MS/MS	0.000334294	34.4535
D-Glucuronic acid	C00191	MS	4.59492e-05	-1.65426
Gluconic acid	C00257	MS/MS	1.38637e-05	-2.83044
ADMA	C03626	MS/MS	0.000698414	1.35622
Acetylcarnitine	C02571	MS/MS	0.000818384	4.03344
3-Hydroxy-N6,N6,N6-trimethyl-L-lysine	C01259	MS	0.00123242	2.8587
Xanthurenic acid	C02470	MS/MS	6.14521e-05	9.98974
Prolylproline	HMDB0011180	MS	0.0103363	1.41703
Indoxyl sulfate	HMDB0000682	MS	0.000181335	26.1603
Glycerylphosphorylethanolamine	C01233	MS	0.0336791	1.70896
Propionylcarnitine	C03017	MS	0.0111782	1.71157
Prolylhydroxyproline	HMDB0006695	MS	0.00200979	-1.55031
Leucylproline	HMDB0011175	MS	0.0326844	-1.31742
Ergothioneine	C05570	MS/MS	1.57689e-06	-2.50577
Ribose 1-phosphate	C00620	MS/MS	3.37264e-07	-2.44019
Butyryl-L-carnitine	C02862	MS/MS	0.00469087	2.64946
3-Hydroxyphenylacetic acid-sulfate	3-Hydroxyphenylacetic acid-sulfate	MS/MS	0.000322266	41.9693
2-Hydroxyphenylacetic acid sulfate	HMDB0240441	MS	0.00013009	37.5241
Nalidixic acid	C05079	MS	0.001391	19.7159
Hydroxypropionylcarnitine	HMDB0013125	MS	0.0296809	-1.34925
L-Cystine	C00491	MS/MS	3.7687e-07	-9.90563
Uridine	C00299	MS/MS	1.45225e-05	-1.72278
Isovalerylcarnitine	HMDB0000688	MS/MS	0.0302458	4.06703
Lysyl-Valine	HMDB0028964	MS/MS	0.000669438	2.80386
Adenosine, 1',2'-didehydro-2'-deoxy-	Adenosine, 1',2'-didehydro-2'-deoxy-	MS/MS	4.91852e-08	-2.00469
Deoxyadenosine	C00559	MS	0.00521425	-1.40473
Nicotinamide riboside	C03150	MS	6.5603e-07	-8.03852
Palmitic acid	C00249	MS	0.0018221	-1.41764
D-Glucosamine 6-phosphate	C00352	MS	0.00025698	1.33362
Glucose 6-phosphate	C00092	MS	6.84438e-06	1.8938
Hydroxyisovalerylcarnitine	HMDB0061189	MS/MS	3.56832e-05	-1.92004
Thiamine	C00378	MS/MS	3.67974e-07	-1.91316
Inosine	C00294	MS/MS	2.29491e-06	-1.96588
Hydroxyhexanoyl carnitine	HMDB0013131	MS	0.000750652	4.66491
L-beta-aspartyl-L-phenylalanine	HMDB0011167	MS	4.43396e-05	6.62473
1-Methyladenosine	C02494	MS/MS	0.000100964	2.55989
Guanosine	C00387	MS/MS	0.044457	-1.54127
Xanthosine	C01762	MS/MS	6.71857e-05	3.29351
Glycylprolylhydroxyproline	HMDB0002171	MS	0.000136658	-2.31043
3-Methylglutarylcarnitine	HMDB0000552	MS/MS	0.0161122	2.62496
D-Ribose 1-diphosphate	C06248	MS	0.000205234	2.83516
N6,N6-Dimethyladenosine	C03416	MS	0.00249411	-1.38608
5'-Methylthioadenosine	C00170	MS	6.4651e-07	2.06866
2-Methylguanosine	HMDB0005862	MS	7.63522e-08	2.18695
D-4'-Phosphopantothenate	C03492	MS/MS	1.32129e-06	-4.45315
octadecanethioamide	octadecanethioamide	MS	3.42136e-06	-3.8469
Sphingosine	C00319	MS	0.00255951	1.42554
N-Acetylglucosamine 6-sulfate	C04132	MS	1.14164e-05	5.36797
N-Acetyl-D-Glucosamine 6-Phosphate	C00357	MS	1.11163e-07	2.09477
Pimelylcarnitine	HMDB0013328	MS/MS	0.00321887	12.3042
Eicosatrienoic acid	C03242	MS	0.00201548	-1.51728
2-oxo-nonadecanoic acid	2-oxo-nonadecanoic acid	MS	0.000908459	-1.45771
Equol-sulfate	Equol-sulfate	MS/MS	0.0343513	-2.52747
Linoleoyl Ethanolamide	HMDB0012252	MS	3.72491e-08	-2.67279
N2-D-Gluconoyl-L-lysine	N2-D-Gluconoyl-L-lysine	MS	0.0034908	1.53028
N-Glycolylneuraminic acid	C03410	MS	0.00133428	2.75374
N-Oleoylethanolamine	C20792	MS	0.000747384	-1.36097
4-Dodecylbenzenesulfonic acid	HMDB0031033	MS	0.0203115	-1.85916
Stearoylethanolamide	HMDB0013078	MS	0.000721425	-1.43245
Ribose-diphosphate	Ribose-diphosphate	MS	8.98851e-07	-2.18917
Docosahexaenoic acid	C06429	MS/MS	0.00457047	-1.36073
MG(16:0/0:0/0:0)	HMDB0011564	MS	0.0396457	-1.37026
Docosadienoate (22:2n6)	C16533	MS	0.0117328	1.36916
13E-Docosenamide	13E-Docosenamide	MS/MS	0.00204747	1.62239
D-myo-Inositol-1,4-bisphosphate (1,4-IP2)	C01220	MS	4.95598e-06	2.07045
Adenosine monophosphate	C00020	MS	0.000109366	-1.78651
Inosine monophosphate	C00130	MS	0.0111244	-1.80982
MG(20:4/0:0/0:0)	HMDB0011579	MS/MS	0.0264599	-1.37452
S-Adenosylhomocysteine	C00021	MS/MS	0.00075608	-1.73759
Vitamin D3	C05443	MS	1.35845e-10	-6.50415
Docosahexaenoyl Glycine	Docosahexaenoyl Glycine	MS	9.5401e-07	-2.97223
Palmitoyl-L-carnitine	C02990	MS/MS	0.00879252	1.70171
25-hydroxyvitamin D3	C01561	MS	0.00179631	-2.25072
MG(22:6/0:0/0:0)	HMDB0011587	MS/MS	0.000283656	-2.02596
N6-Carbamoyl-L-threonyladenosine	HMDB0041623	MS/MS	0.000198768	2.39139
3-hydroxyhexadecanoyl carnitine	HMDB0013336	MS/MS	0.000816951	3.72818
Linoleyl carnitine	HMDB0006469	MS	0.00411374	1.38193
Oleoylcarnitine	HMDB0005065	MS	0.0344686	1.33411
Stearoylcarnitine	HMDB0000848	MS/MS	3.97363e-05	2.05165
LysoPE(P-16:0/0:0)	HMDB0011152	MS	0.00165934	1.31993
Riboflavin cyclic-4',5'-phosphate	C16071	MS/MS	3.88991e-09	-3.51793
Arachidonoylcarnitine	HMDB0006455	MS	0.00433234	-1.35831
LysoPE(16:0/0:0)	HMDB0011503	MS/MS	1.19412e-08	-2.80376
LysoPE(0:0/16:0)	HMDB0011473	MS	6.19787e-09	-2.72883
Arachidyl carnitine	HMDB0006460	MS/MS	3.10956e-05	2.80046
Flavine mononucleotide	C00061	MS	1.10964e-08	-2.34805
LysoPE(P-18:1/0:0)	HMDB0240599	MS	0.000821916	1.42222
LysoPE(P-18:0/0:0)	HMDB0240598	MS	5.97121e-05	1.67038
LysoPE(17:0/0:0)	LysoPE(17:0/0:0)	MS/MS	5.18034e-08	-2.40281
Cervonyl carnitine	HMDB0006510	MS/MS	0.00455326	-1.62763
LysoPE(18:2/0:0)	HMDB0011507	MS/MS	3.84544e-06	-1.99465
LysoPE(0:0/18:2))	HMDB0011477	MS	1.29823e-05	-1.69106
LysoPE(18:1/0:0)	HMDB0011505	MS/MS	7.66263e-09	-2.64846
LysoPE(0:0/18:1)	HMDB0011475	MS	2.16177e-08	-2.31143
LysoPE(18:0/0:0)	C21484	MS/MS	4.03909e-07	-2.18915
LysoPE(0:0/18:0)	HMDB0011129	MS	4.12797e-07	-2.10815
LysoPC(O-16:0/0:0)	LysoPC(O-16:0/0:0)	MS	0.00802054	-1.42988
Docosanoylcarnitine	HMDB0062468	MS	0.000645452	2.52579
LysoPG(16:0/0:0)	HMDB0240601	MS/MS	1.13775e-08	-2.84659
LysoPC(0:0/16:0)	HMDB0240262	MS/MS	5.84933e-06	-1.65465
LysoPC(16:0/0:0)	HMDB0010382	MS/MS	4.90331e-06	-1.66208
LysoPS(16:0/0:0)	HMDB0240605	MS/MS	1.07228e-08	-3.22194
LysoPE(20:5/0:0)	HMDB0011519	MS/MS	1.0912e-05	-2.93917
LysoPE(20:4/0:0)	HMDB0011517	MS/MS	1.15278e-08	-2.88899
LysoPE(0:0/20:4)	HMDB0011487	MS	1.1044e-08	-2.63179
LysoPE(20:3/0:0)	HMDB0011514	MS	0.000180848	-4.27523
LysoPE(20:2/0:0)	HMDB0011513	MS	1.11617e-07	-2.24842
LysoPE(20:1/0:0)	HMDB0011512	MS	1.1918e-08	-2.92619
LysoPC(P-18:0/0:0)	HMDB0013122	MS	0.0040911	1.57562
LysoPG(18:2/0:0)	HMDB0240600	MS	0.00298617	2.27061
LysoPG(0:0/18:2)	LysoPG(0:0/18:2)	MS/MS	0.000257191	3.30699
LysoPE(20:0/0:0)	HMDB0011511	MS	0.00348734	-1.34422
LysoPC(O-18:0/0:0)	C04317	MS	0.0353125	1.30606
LysoPS(O-18:0/0:0)	LysoPS(O-18:0/0:0)	MS	0.00221849	-1.87687
LysoPS(0:0/18:2)	LysoPS(0:0/18:2)	MS	0.00239995	-1.58908
LysoPC(18:1/0:0)	HMDB0002815	MS/MS	1.36435e-05	-1.60865
LysoPC(0:0/18:1)	HMDB0061701	MS	2.59606e-05	-1.65091
LysoPS(18:1/0:0)	HMDB0240603	MS	5.61874e-05	-1.57684
LysoPC(18:0/0:0)	HMDB0010384	MS/MS	0.00989702	-1.30568
LysoPC(0:0/18:0)	HMDB0011128	MS/MS	0.00472674	-1.30753
LysoPE(22:6/0:0)	HMDB0011526	MS/MS	1.82989e-10	-4.30762
LysoPE(0:0/22:6)	HMDB0011496	MS/MS	9.09934e-11	-4.19663
LysoPS(18:0/0:0)	HMDB0240606	MS/MS	3.5014e-05	-1.52052
LysoPS(0:0/18:0)	LysoPS(0:0/18:0)	MS	0.000484928	-1.51818
LysoPE(22:5/0:0)	HMDB0011524	MS/MS	3.54333e-08	-3.68508
Cer(d18:2/16:0)	HMDB0240686	MS/MS	5.01932e-05	-1.32075
LysoPE(22:0/0:0)	HMDB0011520	MS	0.00536542	-1.35165
LysoPS(O-20:0/0:0)	LysoPS(O-20:0/0:0)	MS	0.00196223	-1.51829
LysoPC(20:4/0:0)	HMDB0010395	MS/MS	4.93885e-06	-1.88124
LysoPC(0:0/20:4)	HMDB0061699	MS	3.36231e-06	-1.61551
LysoPS(20:4/0:0)	LysoPS(20:4/0:0)	MS	1.3208e-06	-2.26954
LysoPS(0:0/20:4)	LysoPS(0:0/20:4)	MS	4.15279e-08	-2.68666
LysoPC(20:1/0:0)	HMDB0010391	MS/MS	3.73054e-05	-1.86441
LysoPC(0:0/20:1)	LysoPC(0:0/20:1)	MS	3.05674e-05	-2.36437
LysoPC(0:0/20:0)	LysoPC(0:0/20:0)	MS	2.98163e-05	-1.96782
LysoPC(20:0/0:0)	HMDB0010390	MS	0.000704355	-1.5989
LysoPG(22:6/0:0)	LysoPG(22:6/0:0)	MS/MS	0.00149176	5.54859
LysoPG(0:0/22:6)	LysoPG(0:0/22:6)	MS/MS	0.00125149	4.31246
LysoPC(22:6/0:0)	HMDB0010404	MS/MS	4.79168e-11	-5.64746
LysoPC(0:0/22:6)	LysoPC(0:0/22:6)	MS	2.43185e-11	-5.19065
LysoPS(22:6/0:0)	LysoPS(22:6/0:0)	MS/MS	3.59943e-05	-3.72127
LysoPC(22:5/0:0)	HMDB0010402	MS/MS	1.0516e-05	-3.02859
LysoPI(16:0/0:0)	HMDB0061695	MS	6.9759e-08	-2.06154
LysoPI(18:0/0:0)	HMDB0240261	MS/MS	8.0141e-06	-1.53034
LysoPI(20:4/0:0)	HMDB0061690	MS	1.23216e-05	-1.79012
LysoPI(0:0/20:4)	LysoPI(0:0/20:4)	MS/MS	2.0956e-06	-2.23128
PA(P-16:0/16:0)	PA(P-16:0/16:0)	MS	0.000129266	-1.48154
DG(38:6)	HMDB0007121	MS	8.0002e-05	-1.79122
DG(38:4)	HMDB0007118	MS	0.00120087	1.97874
3-hexanoyl-NBD Cholesterol	3-hexanoyl-NBD Cholesterol	MS	0.00347572	1.48252
SM(d18:1/15:0)	HMDB0240608	MS	0.000292346	1.30921
PC(O-14:0/16:0)	HMDB0013341	MS	0.000710776	2.03423
PC(P-16:0/16:0)	HMDB0011206	MS	6.59812e-05	3.56711
PC(O-16:0/16:0)	PC(O-16:0/16:0)	MS	0.000678106	2.01631
PE(P-16:0/20:4)	HMDB0011352	MS/MS	1.68831e-06	2.84271
SM(d18:1/18:1)	HMDB0012100	MS	3.46483e-05	1.66804
SM(d18:1/18:0)	HMDB0001348	MS	4.70132e-05	1.44217
PC(14:0/18:1)	HMDB0007872	MS	0.000201372	1.50698
PC(P-16:0/18:2)	HMDB0011211	MS	0.00561288	-1.31677
PC(O-16:0/18:2)	HMDB0011151	MS	2.65216e-06	4.56633
PC(16:0/P-18:0)	HMDB0007995	MS	1.14061e-08	3.51997
PE(P-16:0/22:6)	HMDB0005780	MS	0.00101883	1.34767
PC(16:0/18:3)	HMDB0007974	MS	0.00761869	1.4054
PC(16:0/18:2)	HMDB0007973	MS/MS	4.27158e-06	1.62993
PE(16:0/22:6)	HMDB0005780	MS/MS	0.00135309	-1.67982
PC(P-16:0/20:5)	HMDB0011222	MS	0.0249313	-1.78631
PC(O-16:0/20:4)	HMDB0013407	MS	1.11072e-07	3.71904
PE(18:0/20:2)	HMDB0009000	MS	0.00032883	1.63116
PC(16:0/20:4)	HMDB0007982	MS/MS	0.00014932	1.36753
PS(16:0/20:4)	HMDB0012361	MS/MS	0.000487091	-1.46229
SM(d18:1/22:1)	HMDB0012104	MS	0.0157574	1.36197
Flavin adenine dinucleotide	C00016	MS/MS	1.52181e-07	-2.45058
PE(18:0/22:6)	HMDB0009012	MS	1.13709e-10	-2.81862
PC(O-16:0/22:6)	HMDB0013409	MS/MS	2.32566e-05	-2.06901
PG(16:0/22:6)	HMDB0010584	MS	0.000835493	2.22339
PC(16:0/22:6)	HMDB0007991	MS/MS	7.24144e-06	-2.15391
PS(16:0/22:6)	HMDB0012362	MS	7.49661e-08	-2.57636
PC(18:0/20:4)	HMDB0008048	MS	0.000205139	1.42226
PS(18:0/20:4)	HMDB0010165	MS	0.000562641	1.39735
PG(18:2/22:6)	HMDB0010659	MS	0.00252503	2.3811
PC(18:2/22:6)	HMDB0008156	MS/MS	0.00120994	-1.34121
PC(18:0/22:6)	HMDB0008057	MS/MS	4.11725e-07	-1.70683
PI(O-16:0/20:4)	PI(O-16:0/20:4)	MS	6.87059e-06	-2.93364
PC(20:2/22:6)	HMDB0008354	MS	0.0034906	1.37096
PI(16:0/20:4)	HMDB0009789	MS/MS	0.000169476	-1.48646
PC(20:1/22:6)	HMDB0008321	MS	3.42863e-06	3.13887
PC(20:0/22:6)	HMDB0008288	MS	0.00411478	1.47684
PG(22:6/22:6)	HMDB0116605	MS	0.0193574	2.45095
PI(O-16:0/22:6)	PI(O-16:0/22:6)	MS	0.0145648	-2.13891
PC(22:4/22:6)	HMDB0008649	MS	0.00378083	1.43624
PI(16:0/22:6)	PI(16:0/22:6)	MS/MS	1.04781e-08	-3.59162
PI(18:0/20:4)	HMDB0009815	MS	1.24984e-05	1.79554
PI(18:0/22:6)	HMDB0009821	MS/MS	5.93335e-06	-1.6543
